# 1 **u-track 3D: measuring and interrogating dense particle dynamics in three dimensions.**

2 Philippe Roudot\*<sup>1,4</sup>, Wesley R. Legant<sup>2,3</sup>, Qiongjing Zou<sup>1</sup>, Kevin M. Dean<sup>1</sup>, Tadamoto Isogai<sup>1</sup>, Erik S. Welf<sup>1</sup>,

3 Ana F. David<sup>5</sup>, Daniel W. Gerlich<sup>5</sup>, Reto Fiolka<sup>1</sup>, Eric Betzig<sup>6</sup> and Gaudenz Danuser\*<sup>1</sup>

4 1. Lyda Hill Department of Bioinformatics, UT Southwestern Medical Center. Dallas, Texas, U.S.A.

5 2. Department of Biomedical Engineering, University of North Carolina and North Carolina State University, Chapel  
6 Hill and Raleigh, NC, U.S.A.

7 3. Department of Pharmacology, University of North Carolina, Chapel Hill, NC, U.S.A.

8 4. Aix Marseille University, CNRS, Centrale Marseille, I2M, Turing Centre for Living Systems, Marseille, France.

9 5. Institute of Molecular Biotechnology of the Austrian Academy of Sciences. Vienna, Austria.

10 6. Department of Molecular & Cell Biology, University of California. Berkeley, California, U.S.A.

11 \* Corresponding Authors: [philippe.roudot@univ-amu.fr](mailto:philippe.roudot@univ-amu.fr), [gaudenz.danuser@utsouthwestern.edu](mailto:gaudenz.danuser@utsouthwestern.edu)

## 12 Abstract

13 Particle tracking is a ubiquitous task in the study of dynamic molecular and cellular processes through  
14 microscopy. Light-sheet microscopy has opened a path to acquiring complete cell volumes for  
15 investigation in 3-dimensions (3D). However, hypothesis formulation and quantitative analysis have  
16 remained difficult due to fundamental challenges in the visualization and the verification of large and  
17 dense sets of 3D particle trajectories. Here we describe u-track 3D, a software package that addresses  
18 these two challenges. Building on the established framework of particle association in space and time  
19 implemented for 2D time-lapse sequences, we first report a complete and versatile pipeline for particle  
20 tracking in 3D. We then present the concept of dynamic region of interest (dynROI), which allows an  
21 experimenter to interact with dynamic 3D processes in 2D views amenable to visual inspection. Third,  
22 we present an estimator of trackability which defines a score for every trajectory, thereby overcoming  
23 the challenges of trajectory validation by visual inspection. With these combined strategies, u-track 3D  
24 provides a framework for the unbiased study of molecular processes in complex volumetric sequences.

## 25 Introduction

26 Light-sheet fluorescence microscopy (LSFM) achieves three-dimensional (3D) imaging with  
27 minimal phototoxicity, fast sampling, and near-isotropic resolution<sup>1,2</sup>. Given these advances, many  
28 dynamic intracellular processes that were once challenging to study even in 2D (e.g., mitosis,  
29 cytoskeleton organization, vesicle trafficking, molecular interactions), can now be monitored in the  
30 entire cellular volume<sup>1-4</sup>. While the application of computer vision techniques are well established for  
31 interrogating cell biological processes in 2D microscopy<sup>5</sup>, these tools do not provide a solution toward  
32 the interpretation of dense arrangements of structures moving in a dimensionally unconstrained  
33 manner. In 3D, both the visualization of measurement results and their validation require a new set of  
34 computational tools. Indeed, a key challenge for image analysis in 3D is the limited ability for a user to  
35 interact with the data. The manipulation of time-lapse 3D image volumes is often cumbersome, and any  
36 of the projection mechanisms necessary to map the 3D volume into a 2D data representation on a  
37 screen is prone with artifacts that may cause erroneous conclusions<sup>6</sup>. Thus, computational tools for 3D  
38 image analysis must be able to reveal the complexity of 3D cellular and sub-cellular processes, while  
39 being as automated as possible to avoid selection and perception biases.

40 The most elementary way to measure the behavior of intracellular processes in space and time is  
41 particle tracking. Particles can comprise sub-diffraction sized objects that appear in the image volume as  
42 bona fide spots, objects of an extended size that appear as a rigid structure, and larger deformable  
43 objects. The more complex the object's shape is, the more sophisticated methods are needed for  
44 particle detection. The problem of particle tracking is then defined as the reconstruction of a set of  
45 trajectories across time points given the coordinates  $[x(t), y(t), z(t)]$  of the identified particles in the  
46 individual time points. Many approaches have been proposed to solve this problem<sup>7-10</sup>. However, only  
47 a few of these methods have been implemented in 3D and none of those approaches tackle the  
48 visualization and interpretation challenges<sup>7,11-13</sup>.

49 Building upon our previous particle tracking work<sup>2,9,14</sup>, we designed the software package u-track 3D to  
50 enable the measurement, observation and validation of dynamic processes in 3D (Fig. 1). u-track 3D can  
51 detect and track morphologically and dynamically diverse cellular structures, including single molecules,  
52 adhesion complexes, and larger macromolecular structures such as +TIP protein complexes associated  
53 with growing microtubules. The software design is open, allowing users to import the coordinate files  
54 from other detection routines and then apply the u-track framework only for trajectory reconstruction.  
55 To overcome challenges inherent to volumetric data, we introduce an extensive library for visualization  
56 and mapping of dynamic region of interests (dynROIs) that move with the biological structure under  
57 evaluation and enable an intuitive visualization of particle behaviors. Finally, as it is generally impossible  
58 to visually validate the trajectory reconstruction in 3D, we present an algorithm for automatic  
59 assessment of particle *trackability* throughout the image volume.

## 60 Results

61 The u-track 3D pipeline is designed to measure, visualize and validate complex  
62 entanglements of 3D trajectories

63

### 64 *Multiple particle tracking*

65 To generate a robust 3D particle tracking package, we adopted and modified features that were critical  
66 for accurate particle tracking in 2D<sup>9</sup>. This includes the break-down of trajectory reconstruction into a  
67 frame-by-frame association of corresponding particles followed by an association of the resulting track

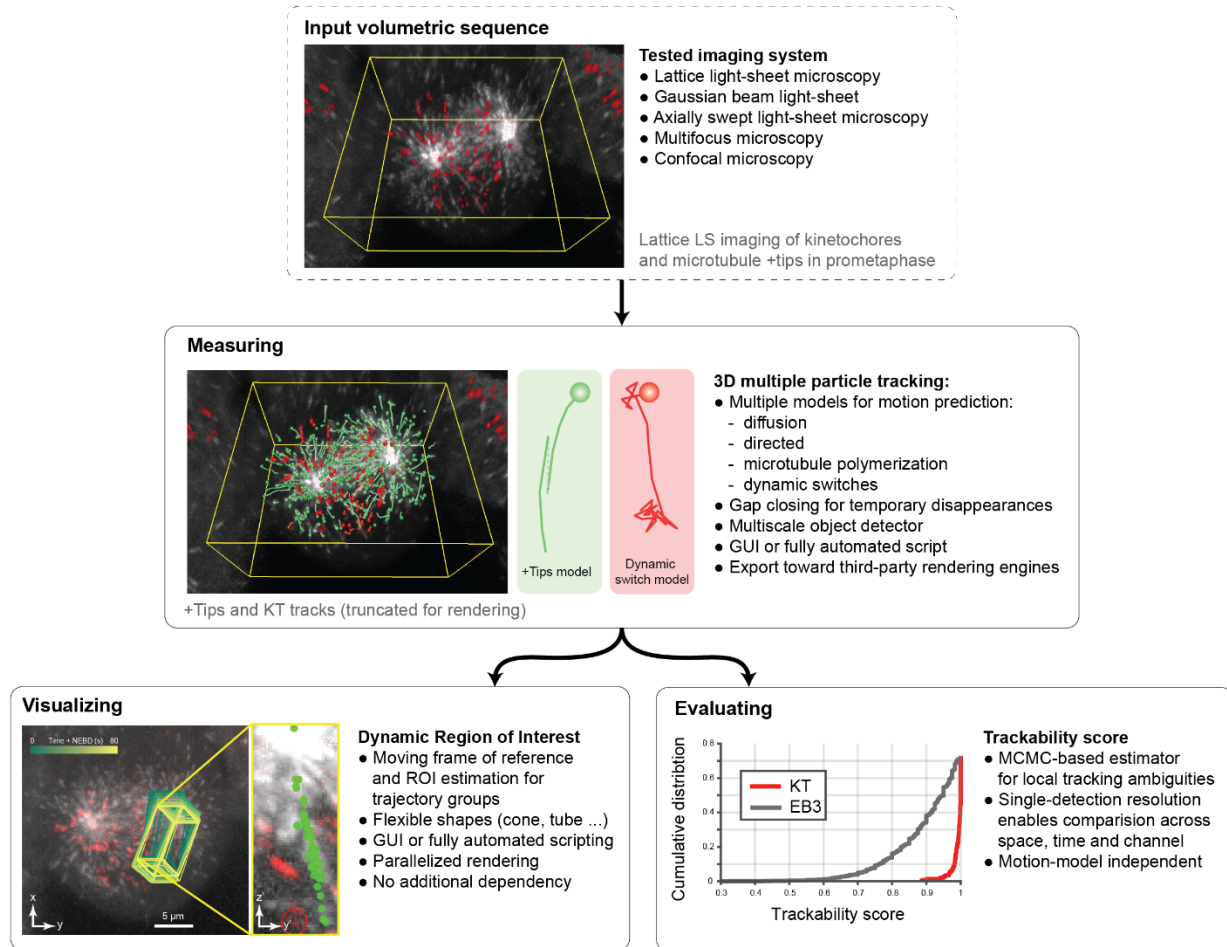

**Figure 1:** u-track 3D is a complete pipeline for the measurement, visualization, and evaluation of large sets of 3D trajectories. The pipeline is illustrated on lattice light-sheet imaging of HeLa cells undergoing mitosis labeled with eGFP-labeled EB3 and mCherry-labeled CENPA.

68 segments into full-length trajectories. Both steps rely on the same solution for optimal one-to-one  
 69 assignments of particle detections and track segments in a bipartite graph<sup>9,15</sup>. The two-step approach  
 70 permits the closing of temporal gaps in the detection of a particle, as well as the handling of particle  
 71 merging and splitting events that are inherent to many biological processes. As such, the resulting set of  
 72 trajectories is a global optimum in space and time for a given set of detections. Moreover, u-track 3D  
 73 incorporates a Kalman filtering approach to model on the fly the characteristics of a particle's Brownian,  
 74 directed, and heterogeneous motion, which supports both the procedure for frame-by-frame particle  
 75 association and the one of track segment association. To support the concurrent tracking of objects of

76 variable sizes we implemented a multiscale particle detector equipped with a generalized adaptive  
77 thresholding approach (see Section “Multiscale particle detector” in Material and Methods).

### 78 *Dynamic regions of interest*

79 Moving from 2D to 3D images complicates the interaction of a human observer with both raw and  
80 derived data. Widely used global image projections, including maximum intensity projection, and other  
81 volume rendering techniques are limited by the overlap of many dynamic structures along the viewing  
82 axis<sup>6</sup>. However, detailed visualization of 3D images and trajectories in their local context is essential for a  
83 user to adjust software control parameters and to interpret the underlying biology. As such, projection  
84 approaches have to be tailored to emphasize a subset of selected voxel or aspects of highest interest.  
85 Such projections should not only bring the particle or group of particles of interest into focus, but also  
86 continuously adapt as the particles move. To meet this requirement, u-track 3D incorporates a  
87 framework for rendering particle-centric dynamic regions of interest (dynROIs), thereby allowing the  
88 user to follow the particle behavior throughout its lifetime in a visually-comprehensible format. DynROIs  
89 are implemented in a hierarchical object structure across molecular, macromolecular and cellular scales  
90 (see Section “Dynamic Region of Interest estimation” in Material and Methods). First, u-track 3D  
91 provides a variety of shapes (rectangle cuboids, spheres, cones, tubes and rounded tubes) to define  
92 region of interest made of one, two or three trajectories. Second, to manage larger sets of tracks,  
93 dynROIs are built by estimating an affine transform between the associated point cloud in consecutive  
94 time points. Finally, the top level dynROI is defined for the cell. For example, cells embedded in a 3D  
95 environment are often randomly oriented, and their orientation changes throughout time. While image-  
96 based registration can be used to correct changes in cell orientation, it is computationally expensive,  
97 especially as the size of the volume and length of the sequence grows. To reduce the computational  
98 burden, we segment and transform the cell mask into a randomly down-sampled point cloud, which is  
99 then used to estimate an affine transform.

## 100 *Trackability Score*

101 Validation of tracking results is crucial for proper parameter adjustment during image acquisition and  
102 analysis as well as the biological interpretation of integrated measurements. However, it remains an  
103 extremely challenging task in 3D datasets, particularly when the particle density is high. Contrary to a  
104 scenario in 2D where a single field of view presents a wide range of trajectories for visual inspection,  
105 dynROIs in 3D tend to capture only a few trajectories and cannot represent the heterogeneity of local  
106 image quality, particle density and dynamic properties, which all affect the tracking accuracy. To solve  
107 this problem, we complement u-track 3D with the computation of a local trackability score. For a  
108 scenario of homogeneous particle density and directionally random displacements, we offered in  
109 previous work a model to compute the probability of tracking errors<sup>2</sup>. However, in a more realistic  
110 model, each trajectory bears its own level of uncertainty based on its own stochastic footprint and the  
111 configuration of neighboring particles. Here, we compute for every trajectory and every time point the  
112 confidence by which the algorithm was able to assign the chosen particle to the trajectory (see Section  
113 “Stochastic programming for the evaluation of trackability” in Material and Methods). Specifically, we  
114 exploit the particle history, the detection accuracy and the associated motion model(s) to derive a  
115 trackability metric that represents the likelihood of each of the chosen associations vis-à-vis the set of  
116 alternative associations with neighboring particles. We demonstrate the performance of the resulting  
117 score and how it can be used to compare trackability across space, time and the molecules under study.

## 118 *3D MPT combined with light-sheet microscopy simplifies the measurement of endocytic* 119 *lifetime but gap closing remains a crucial step*

120 To assess the performance of u-track 3D, we investigated the dynamics of various cellular structures  
121 imaged by light-sheet microscopy (Figure 2). As reported with u-track, gap closing is a crucial step in 2D  
122 particle tracking because of the frequent, transient disappearances: particles might not be detected,  
123 particles move in and out of the microscope’s in-focus volume, or particles can temporarily overlap in

124 space. While the latter two sources of disappearance are largely eliminated by proper 3D imaging, the  
125 challenges of false or missing detections remain. To test the performance of u-track 3D in closing gaps,  
126 we examined the lifetimes of clathrin-coated structures forming at the cell plasma membrane (Fig 2a-c).  
127 These structures represent mostly sub-diffraction objects, i.e. they appear in an imaging volume as 3D  
128 point-spread functions. We used high-resolution diagonally swept light-sheet microscopy<sup>2</sup> to sample  
129 every second a full volume of puncta generated by the GFP-labeled AP2 subunit of the endocytic coat. In  
130 this volumetric sequence, u-track 3D recovered the canonical lifetime distributions of abortive and  
131 maturing clathrin-coated pits, that is, an exponential decay for abortive pits and Rayleigh-like  
132 distribution with maximal probability around 20 s for maturing pits (Fig 2.c, Movie 1 and Section  
133 “Clathrin-mediated endocytosis study on a glass coverslip” in Materials and Methods). While the  
134 identification of those two populations has required extensive trajectory analysis to discount  
135 incomplete trajectories caused by the limitations of 2D microscopy (e.g. the transient arrival of golgi-  
136 associated clathrin coated structures into the evanescent illumination field)<sup>16</sup>, our u-track software  
137 achieves accurate trajectory classification directly by thresholding the maximum intensity of trajectories  
138 in 3D (Fig 2.b,c). Importantly, the separation of lifetime distributions into two pit classes can only be  
139 obtained with the support of gap closing (Fig 2.c), suggesting that gaps present a hurdle for accurate  
140 tracking also in 3D.  
141

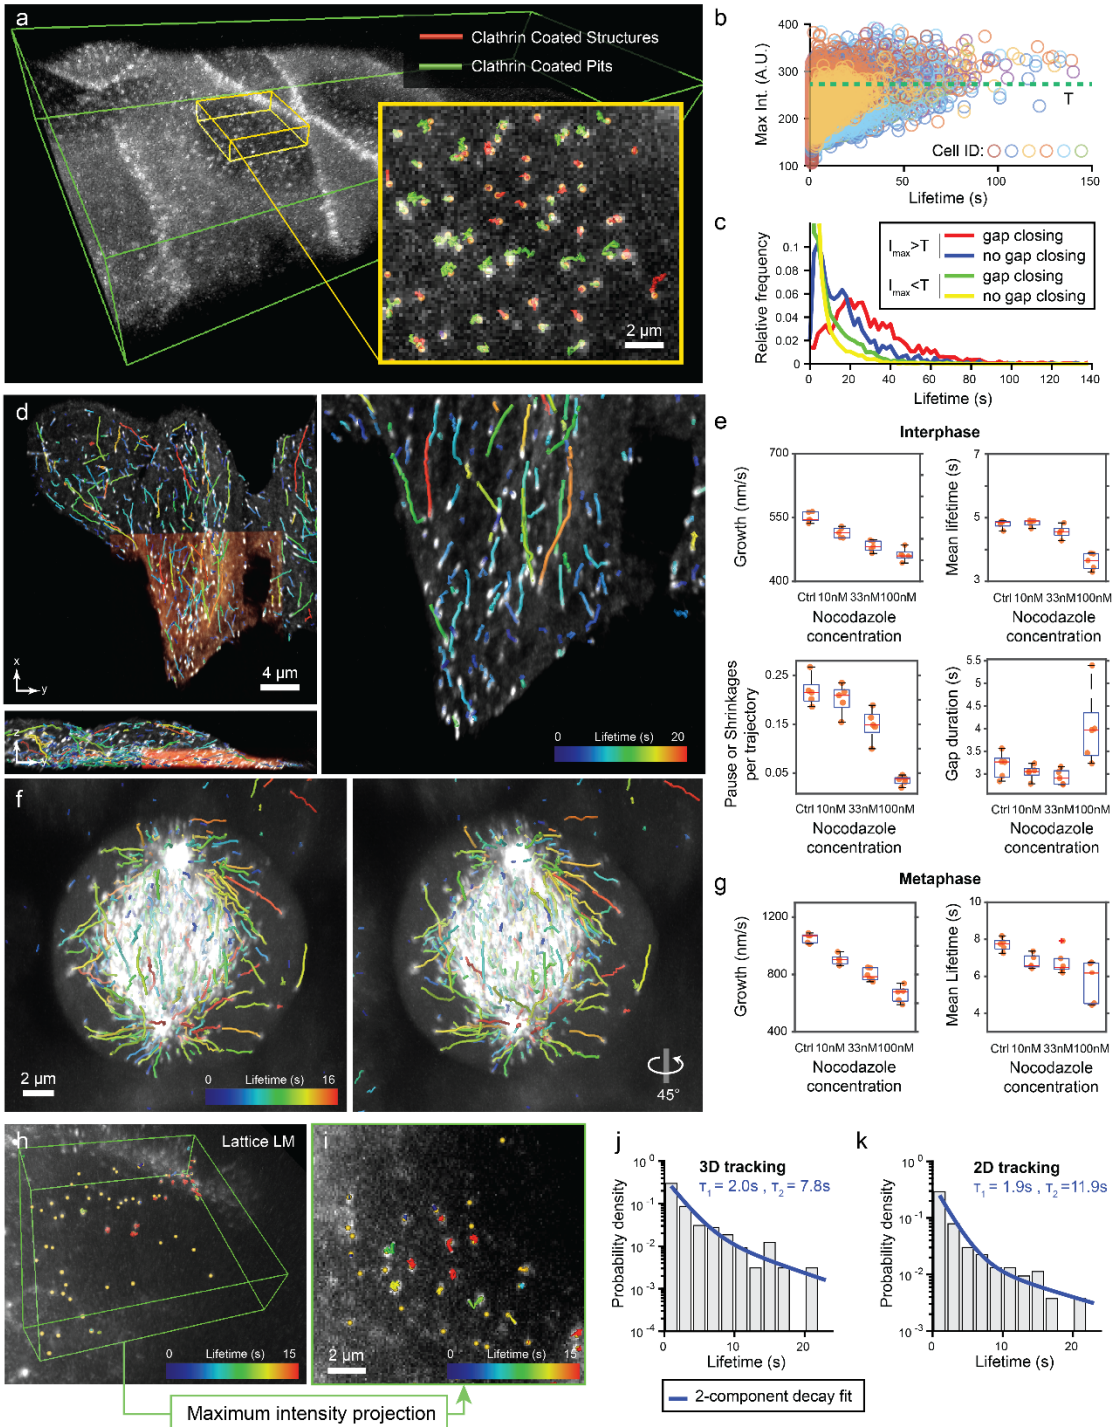

142

143 **Figure 2: u-track 3D supports a variety of imaging and biological scenarios.** a) Maximum intensity  
144 projections (MIP) of a rat kidney cell layer imaged with diagonally scanned light-sheet microscopy (diaSLM). Cells  
145 are expressing eGFP-labelled alpha subunit of the AP-2 complex. Green box is 160x40x12  $\mu$ m. Inset shows  
146 trajectories of clathrin aggregates classified as clathrin coated structures or maturing pits. b) Normalized maximum



147 intensity of each trajectory as a function of lifetime plotted for six cellular layers composed of multiple cells each.  
148 The green line denotes the median of the cumulated distribution (value T). c) Probability density of lifetime for the  
149 set of trajectories above and below the threshold value T, with and without gap closing (N=6 cellular layers, pooled  
150 trajectories lifetimes). d) Maximum intensity projection (MIP) of HeLa cells in interphase imaged with lattice light-  
151 sheet microscopy (LLSM) expressing eGFP-labeled EB1 (orange area is 30x32x7  $\mu\text{m}$ ). Overlay highlights EB1  
152 trajectories. e) Average microtubule lifetimes, microtubule growth rate as well as average number and duration of  
153 pause and shrinkage events per trajectory for increasing concentrations of nocodazole (N = 5 per conditions;  
154 center line, median; box limits, 25 and 75 percentiles; whiskers, extremum). f) MIP of HeLa cells in metaphase  
155 imaged with LLSM along with 45-degree rotation around the vertical axis. Overlay highlights EB1 trajectories. g)  
156 Same as e) measured for cells in metaphase (N = 5 per conditions). h) MIP of mouse embryonic stem cell (ES)  
157 nucleus imaged with LLSM expressing GFP-labeled transcription factors. Green box is 13x13x3  $\mu\text{m}$ . Overlay  
158 highlights SOX2 trajectories. i) MIP of ES cell nucleus imaged with LLSM expressing GFP-labeled transcription  
159 factors. Overlay highlights SOX2 trajectories tracked after MIP transformation. j) Probability density of SOX2  
160 binding time measured in LLSM overlaid with a 2-component decay fit (N=1 cell). k) Probability density of SOX2  
161 binding time measured in projected LLSM data overlaid with a 2-component decay fit (N=1 cell).

## 162 [Directed motion filtering captures drug-induced variations in microtubule polymerization](#) 163 [in dense 3D spindle imaged with lattice light-sheet microscopy](#)

164  
165 With limited sampling frequency in volumetric imaging due to the serial acquisition of a z-stack  
166 comprising tens to hundreds of focal slices, the automated reconstruction of particle trajectories can be  
167 improved by dynamic motion models through Kalman filtering. To assess the performance of a 3D  
168 implementation of previously published motion models for 2D tracking of microtubule polymerization  
169 dynamics<sup>17,18</sup>, we imaged and tracked the dynamics of microtubules in HeLa cells by following GFP-  
170 fusions of the microtubule plus-end tracking protein EB1 using lattice light-sheet imaging<sup>1</sup> at 1 Hz in  
171 interphase and metaphase. We quantified metrics such as growth rate, growth lifetime and pause  
172 frequency (see Section “Microtubule instability measurement” in Material and Methods). The latter is a  
173 measure for the probability that a stalled or shrinking microtubule, which is accompanied by

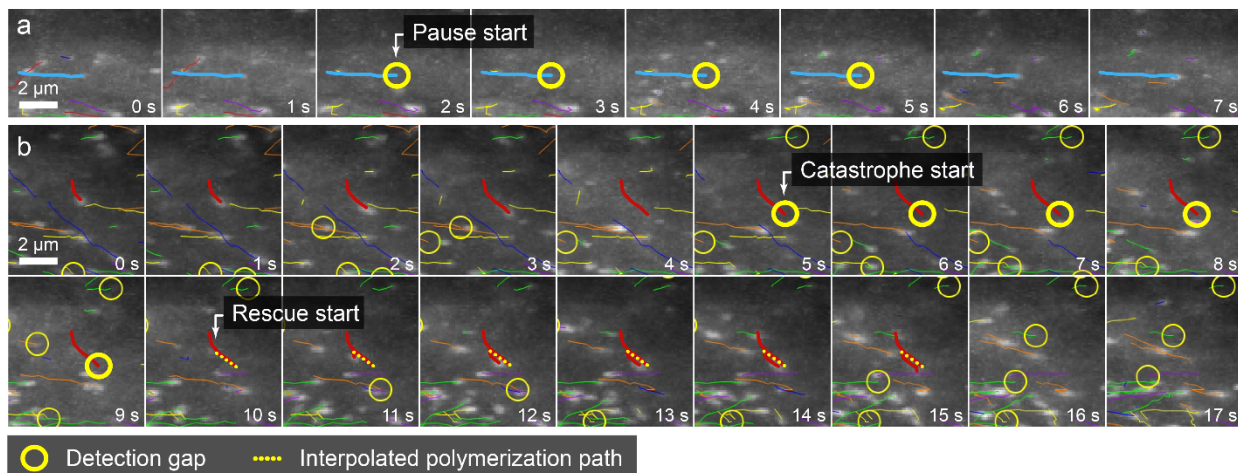

**Supplementary Figure 1:** a) Example of a pause in microtubule polymerization detected in HeLa cell in interphase (detail). Yellow circles highlight detection gaps. b) Example of catastrophe and rescue events detected in the same sequence (detail).

174 disappearance of the EB1 particle in the movie, is rescued to renewed growth (see Supplementary  
175 Figure 1 and Movie 2). Consistent with our previous observations in 2D<sup>17</sup>, u-track 3D faithfully detected a  
176 dose-dependent decrease in all three metrics upon treatment of cells with the microtubule-destabilizing  
177 drug nocodazole (Fig 2.d-e). We also investigated the destabilizing effect of nocodazole by measuring  
178 the number and duration of pauses or shrinkages that occur with drug treatment (Fig 2.e) until  
179 disappearance at the highest concentration. We then extended our analyses to mitotic cells, where the  
180 density of EB1 particles is much higher in central regions of the mitotic spindle (see Movie 3). Both  
181 scenarios show a strong response in nocodazole concentration, indicating that u-track 3D properly  
182 captures the drug-induced variation of growth rate and lifetime (Fig 2.f-g), despite strong variations in  
183 particle density.

184 [2D measurements artificially increases the lifetime of interaction between Transcription](#)  
185 [Factor and chromatin](#)

186 We then sought to investigate the impact of the depth information on the measurement of biological  
187 quantities when compared to 2D particle tracking. We compared the u-track gap closing and motion  
188 modeling capacities, including an approach to follow particle trajectories with erratic go-stop-go

189 behaviors<sup>14</sup>, in both 2D and 3D data using single molecule imaging. We used a lattice light-sheet  
190 microscope to image the interactions between transcription factors (TFs) and chromatin in embryonic  
191 stem cells. In a study using the same biological system, Chen *et al*<sup>19</sup> had shown that TFs alternate  
192 between short-lived binding events at non-specific chromatin sites (residence time  $\sim 0.75$ s), 3D diffusion  
193 (average duration  $\sim 3$ s) and longer lived transcription events where the TF is bound at specific chromatin  
194 sites (residence time  $\sim 12$ s). These results were quantified in 2D using both light-sheet and widefield  
195 imaging. We performed the same analysis, now applying 3D tracking, and contrasted the results to the  
196 tracking of 2D projections of the same 3D volumes (Fig 2.h-k and Section “Single molecule dynamics  
197 study with lattice light-sheet microscopy” in Materials and Methods). Interestingly, when analyzed in  
198 3D, the residence time of binding events was reduced by one third ( $\sim 7.8$ s in 3D vs 11.9s in 2D). Thus,  
199 only on 2D projections are we able to reproduce the results of the original study , which differ  
200 significantly from the 3D results. Interestingly, the shorter binding time observed in 3D trajectories is  
201 consistent with measurements performed in nuclear receptors studies<sup>20,21</sup>. Together, these data suggest  
202 that the overlap caused by axial integration of the fluorescent signal imaged in 2D may artificially  
203 prolong the lifetimes and change the conclusion on binding kinetics.

### 204 3D adhesion formation visualization and analysis using dynamic region of interest 205 suggests that rounder adhesions are closer to collagen fibers.

206  
207 We illustrate the application of a whole-cell dynROI with the study of spatial interactions between cell-  
208 matrix adhesions and fluorescently labeled 3D collagen fibers in osteosarcoma cells imaged by axially  
209 swept light-sheet microscopy<sup>3</sup> (Fig 3.a and Movie 4). The dynROI allowed us to visualize the relationship  
210 between adhesion shapes and its proximity to collagen fibrils, showing two populations of globular and  
211 elongated adhesions (Fig 3.b-d). The most elongated adhesions are located predominantly at the tip of  
212 the pseudopodial extensions and align with the protrusive direction, while the round adhesions  
213 concentrate in the quiescent part of the membrane. Our measurements show that this elongation

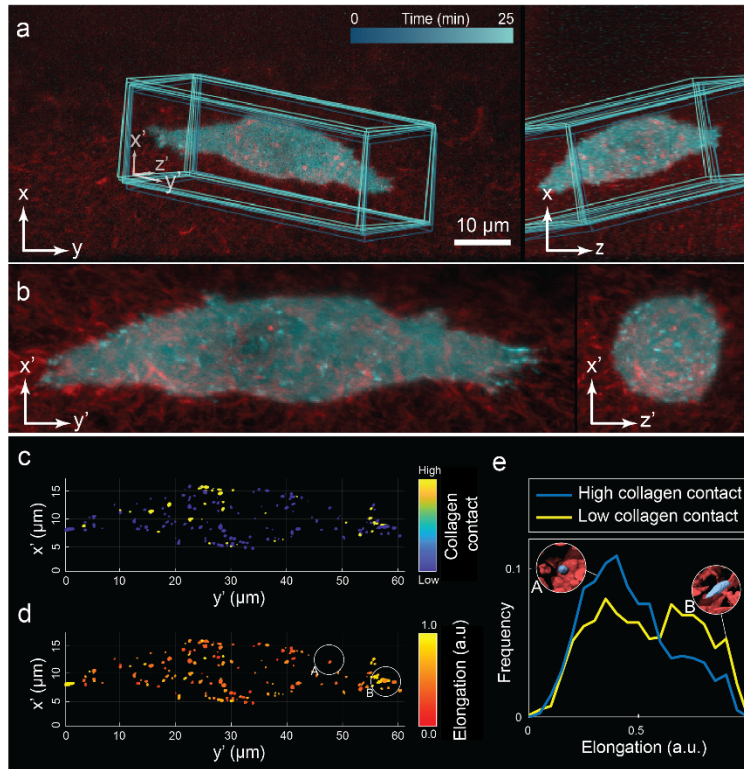

**Figure 3:** Dynamic Regions of Interest (dynROI) reveals the behavior of local particle involved in highly dynamic sub-cellular processes. a) Dual-colored orthogonal MIP of osteocarcinoma cells expressing eGFP-labeled paxillin and embedded in collagen labelled with Alexa fluor 568. Overlay highlights dynamic region of interest (dynROI). b) View of the dynROI. c) – d) Detection of adhesions colored as a function of the degree of collagen contact and elongation. e) Probability density of elongation for adhesions with high and low degree of contact with collagen fibers (N=1 cell).

214 distribution can be decomposed further (Fig 3e). We found a unimodal distribution of mostly globular  
215 adhesions in close contact with collagen fibers, assessed by a score that integrates the distances  
216 between voxels in adhesions and collagen fiber masks (see Section “Adhesions and collagen interaction  
217 imaging and analysis” in Materials and Methods). In contrast, adhesions with a lesser degree of collagen  
218 contact display a bimodal distribution of globular and elongated adhesions. These data suggest – quite  
219 unexpectedly from what is known in 2D – that the most engaged adhesions may be the least  
220 elongated<sup>22</sup>. We further conjecture from this finding that adhesion elongation in 3D may be less driven

221 by a zippering of an integrin-mediated plaque along a collagen fiber, but rather dictated by the  
222 organization of cell-cortical actin fibers or the local collagen architecture. Indeed, this behavior becomes  
223 apparent by replay of time-lapse sequences of the proximity and elongation parameters in the spatially  
224 stabilized dynROI (Movies 5, 6 and 7). DynROIs are thus a powerful way to assess the spatial distribution  
225 and heterogeneity of molecular interactions in highly dynamic cells.

226 [Dynamic region of interest enables the automated exploration of mitotic spindle across](#)  
227 [scale and the observation of different kinetochore capture mechanisms by microtubules](#)

228  
229 Many cellular processes involve a massive reorganization of multiple macromolecular structures, which  
230 challenges 3D analysis by conventional visualization approaches. A classic example is the mitotic spindle  
231 of vertebrate cells<sup>23</sup>. While thousands of microtubules reorganize to form a dense bipolar array, the two  
232 spindle poles move apart and rotate back and forth. At the same time, spindle microtubules establish  
233 contacts with chromosomes at specialized attachment sites termed kinetochores, and subsequently  
234 move chromosomes towards poles or the spindle center. The complexity of these structures and their  
235 rapid dynamics are virtually impossible to understand by mere visual inspection of volume renderings.  
236 We therefore assessed how u-track 3D and dynROIs facilitates the analysis of this process. The image  
237 dataset comprises dual-channel time-lapse sequences of GFP-labelled microtubule plus-ends and  
238 mCherry-labelled kinetochores of mitotic HeLa cells, acquired by lattice light sheet microscopy as  
239 described in ref<sup>24</sup>, with an acquisition frequency of 0.1 Hz to enable longer imaging, from prometaphase  
240 to metaphase. In addition to microtubule plus-ends and kinetochores, our multiscale particle detection  
241 approach is able to locate the spindle poles based on the diffuse clouds of microtubule plus-end marker.  
242 Pole trajectories can then be used to define a dynROI that follows the spindle motion (Fig 4.a and  
243 Section “Dynamic Region of Interest estimation” in Materials and Methods). An embedded second  
244 dynROI follows the point cloud formed by the kinetochore trajectories (Fig 4.b and Section “Dynamic  
245 Region of Interest estimation” in Materials and Methods). Based on the pair of dynROIs, we further

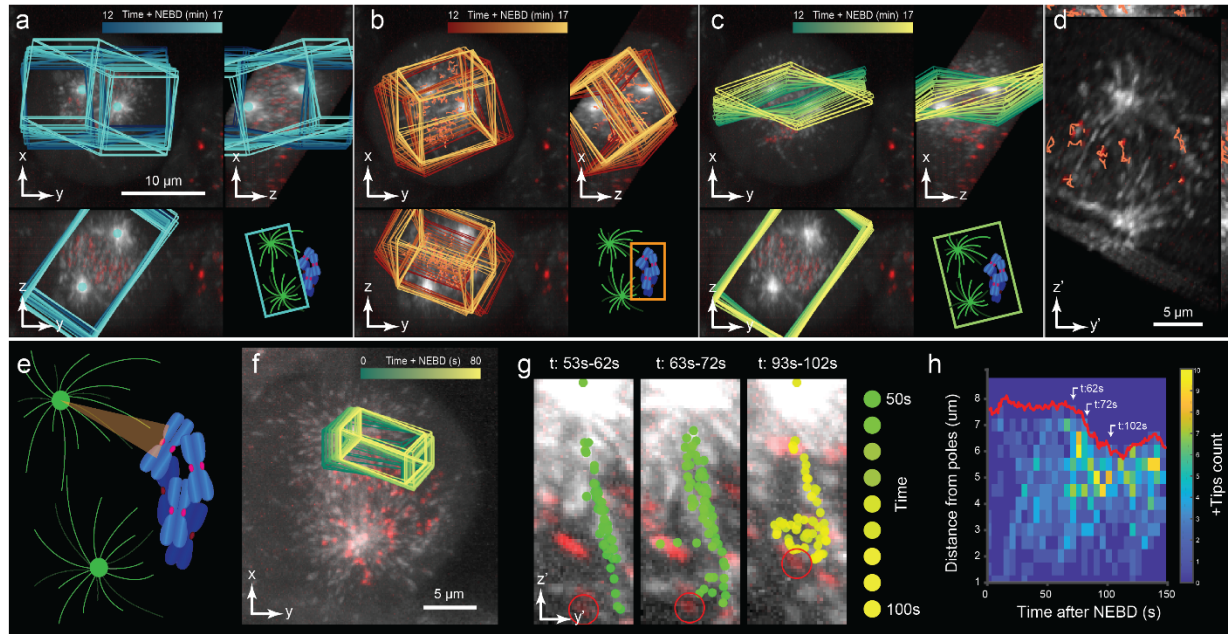

**Figure 4:** a) - d) Dual-colored orthogonal MIP of HeLa cells undergoing mitosis labeled with eGFP-labeled EB3 and mCherry-labeled CENPA. Overlays highlight, a) a dynROI built around centrosome trajectories, b) a dynROI built around CENPA trajectories, and c) a plane built to visualize the dynamics of chromosomes relative to the spindle location. d) View of the dynROI following described in h. e) Definition of a conical dynROI between a centrosome and a kinetochore. f) Dual-colored orthogonal MIP of HeLa cells during pro-metaphase. Overlay highlights the motion of the dynROI. g) Cumulative overlays of the detected microtubule plus-end position for three periods of 10 seconds between 53s to 102s post nucleus envelope breakage. h) Plus-ends count function of time and distance from the pole (N = 1 dynROI).

246 construct a planar dynROI with an orientation that is defined by the inter-polar axis and a vector  
 247 following the kinetochore-associated dynROI motion (Fig 4.c,d, Movie 8, 9 and Section “Dynamic Region  
 248 of Interest estimation” in Materials and Methods). Our framework for dynROI estimation thus enables  
 249 the automated visualization of dynamic mesoscale structures composed of different molecular  
 250 assemblies.  
 251 The hierarchical model of dynROIs also enables the detailed analysis of microscale collective molecular  
 252 processes that move throughout the cellular volume. This facilitates the study of complex subprocesses,  
 253 as for example the formation of kinetochore fibers during spindle assembly. In previous work<sup>24</sup>, we

254 showed with spindle-wide statistics and indirect modeling that kinetochore fiber formation is  
255 accelerated by an augmin-dependent nucleation and directional growth along the fiber towards  
256 kinetochores. To expand the analysis of this process, we now use dynROIs to directly visualize the  
257 dynamic space between spindle poles and kinetochores (Fig 4.e-g and Movie 10). We define a  
258 kinetochore fiber assembly dynROI by a cone whose medial axis connects spindle pole and a target  
259 kinetochore (see Section “Dynamic Region of Interest estimation” in Materials and Methods). By  
260 systematically inspecting kinetochore fiber assembly dynROIs, we observed a strong directional bias in  
261 microtubule polymerization along a kinetochore fiber and toward kinetochores, consistent with  
262 previous observations<sup>24</sup>. We also observed microtubule polymerization branching off from a kinetochore  
263 fiber and polymerizing toward another kinetochore (circled in red in Fig 4.g, time 53 s – 72 s). The  
264 branching was followed by a rapid poleward motion of the targeted kinetochore and an increase of plus-  
265 end count in the dynROI (Fig 4.g,h, time 93 s – 102 s) suggesting that the target kinetochore was  
266 captured, and that this new capture established a new avenue for microtubule amplification. This data  
267 indicates that kinetochore capture might occasionally involve interactions between neighboring  
268 kinetochore fibers. The example underscores how the dynROI library implemented in u-track 3D enables  
269 the visual discovery of dynamic processes that are completely obscured in 3D image volumes.

## 270 [The trackability score detects tracking ambiguities with high precision](#)

271 Given how cumbersome it is to visualize particle trajectories, a systematic validation of the tracking  
272 performance by visual inspection – the gold standard in most cell biological studies in 2D – seems out of  
273 reach for many applications in 3D. Thus, we developed a self-assessment pipeline that attributes every  
274 trajectory with a trackability score predicting the accuracy of the automated tracking solution. The  
275 principle behind the trackability score and its performances are explained in Figure 5 and Section  
276 “Stochastic programming for the evaluation of trackability” of Material and Methods. Figure 5.a shows  
277 an example of an ambiguous association between time  $t - 1$  and  $t$  where two assignment hypotheses

278 between detections and track heads have a similar association cost. Despite this ambiguity, the bipartite  
279 graph matching identifies a single optimal solution without the possibility for error estimation (see Fig  
280 5.a.i). To determine the level of ambiguity, we resample all track head predictions  $N$  times and test the  
281 stability of the original assignment (one resampling example is shown in Fig 5.a.ii). The approach is  
282 illustrated in Figure 5.b-d based on the tracking of a transcription factor in a dataset acquired with  
283 multifocus microscopy and previously published in ref<sup>25</sup>. Each dot indicates a resampled prediction of  
284 the particle location at  $t$ , and blue versus red defines whether the newly computed local assignment  
285 matches or differs from the original solution. The trackability score is defined as the fraction of  
286 matching samples. As such, the trackability score infers tracking accuracy by considering both the local  
287 competition of detection candidates for track head associations and the uncertainty of motion  
288 prediction for each track head.

289 We evaluated the capacity of our score to predict tracking quality in a variety of scenarios. We  
290 simulated multiple sets of trajectories of increasing complexity and applied u-track 3D to trace the  
291 particle movements between time points. Using the ground truth, we then classified each link of the  
292 extracted traces as a true positive (TP) or false positive (FP). This classification allows us to compute for  
293 each simulated sets the true Jaccard Index (JI), a popular metric for linking accuracy<sup>7</sup>, computed as  $JI =$   
294  $\frac{TP}{TP+FP+FN} = \frac{TP}{FP+L}$  where L represents the number of simulated links. Of note, we did not introduce  
295 noise to the set of simulated particle detections to focus our evaluation on the ability to predict the risk  
296 of linking errors. Figure 5.f presents an example of simulated trajectories with increasing diffusion  
297 coefficients; the display is truncated to five consecutive time points to improve visibility. With a  
298 detection density fixed to  $0.1 \text{ um}^{-3}$  and increasing speed of diffusion, the tracking performance rapidly  
299 deteriorates to completely inaccurate links and trajectory lifetime distributions (see Fig 5.g-h). The  
300 trackability score follows precisely the decrease in the JI until it plateaus at 0.5 for very challenging



301 conditions (Fig 5.i). The initially close match between trackability score and JI is expected by design as  
302 larger diffusion speeds increase ambiguities as well as the number of false positives and negatives.  
303 However, beyond a diffusion of  $0.6 \text{ um}^2/\text{s}$ , the prediction of the particle location in the next frame is less  
304 likely centered on the correct detection. As such, during the resampling of the expected particle  
305 location, the rate of samples in agreement versus disagreement with the original link is defined by  
306 chance, hence the score plateaus at 0.5. We also simulated a scenario in which the particle density  
307 increases at a diffusion fixed to  $0.3 \text{ um}^2/\text{s}$ . Analogous to the increase in diffusion, the trackability score  
308 follows the JI up to a density of  $0.25 \text{ um}^{-3}$  where the two performance measurements start to diverge  
309 (see Supplementary Figure 2). In the case of directed displacements and a given density of  $0.1 \text{ um}^{-3}$ , our  
310 trackability score also follows the true JI up until a critical velocity of  $1.8 \text{ um/s}$  which is more than twice  
311 the average distance between a particle and its closest neighbor (see Supplementary Figure 3). Finally,  
312 we sought to test our approach in a scenario in which trajectories undergo sudden transitions between  
313 diffusive and directed motion (see Supplementary Figure 4). Of note, the densities, diffusion coefficients  
314 and velocities are fixed in this scenario and the only parameter that varies is the transition rate, ranging  
315 from 0 (no transition) to 0.5 (on average one transition every two frames). Our results show that the  
316 trackability score also correctly predicts the reduction in tracking accuracy as increasing transition rates  
317 makes tracking more challenging. A quasi-plateau is reached due to the high frequency of dynamic  
318 transitions. A detailed description of the parameters used for all simulation experiments can be found in  
319 Section "Simulation parameters for trackability evaluation". In conclusion, our simulations show that the  
320 proposed trackability score is able to detect subtle changes in tracking quality in a large variety of  
321 scenarios. While our score diverges from the true Jaccard Index when the simulated frame rate is not  
322 high enough to initialize motion prediction, the trackability score nevertheless detects at least 60% of  
323 linking errors, indicating that the tracking experiment must be re-designed for accurate estimation of  
324 both trajectories and errors.

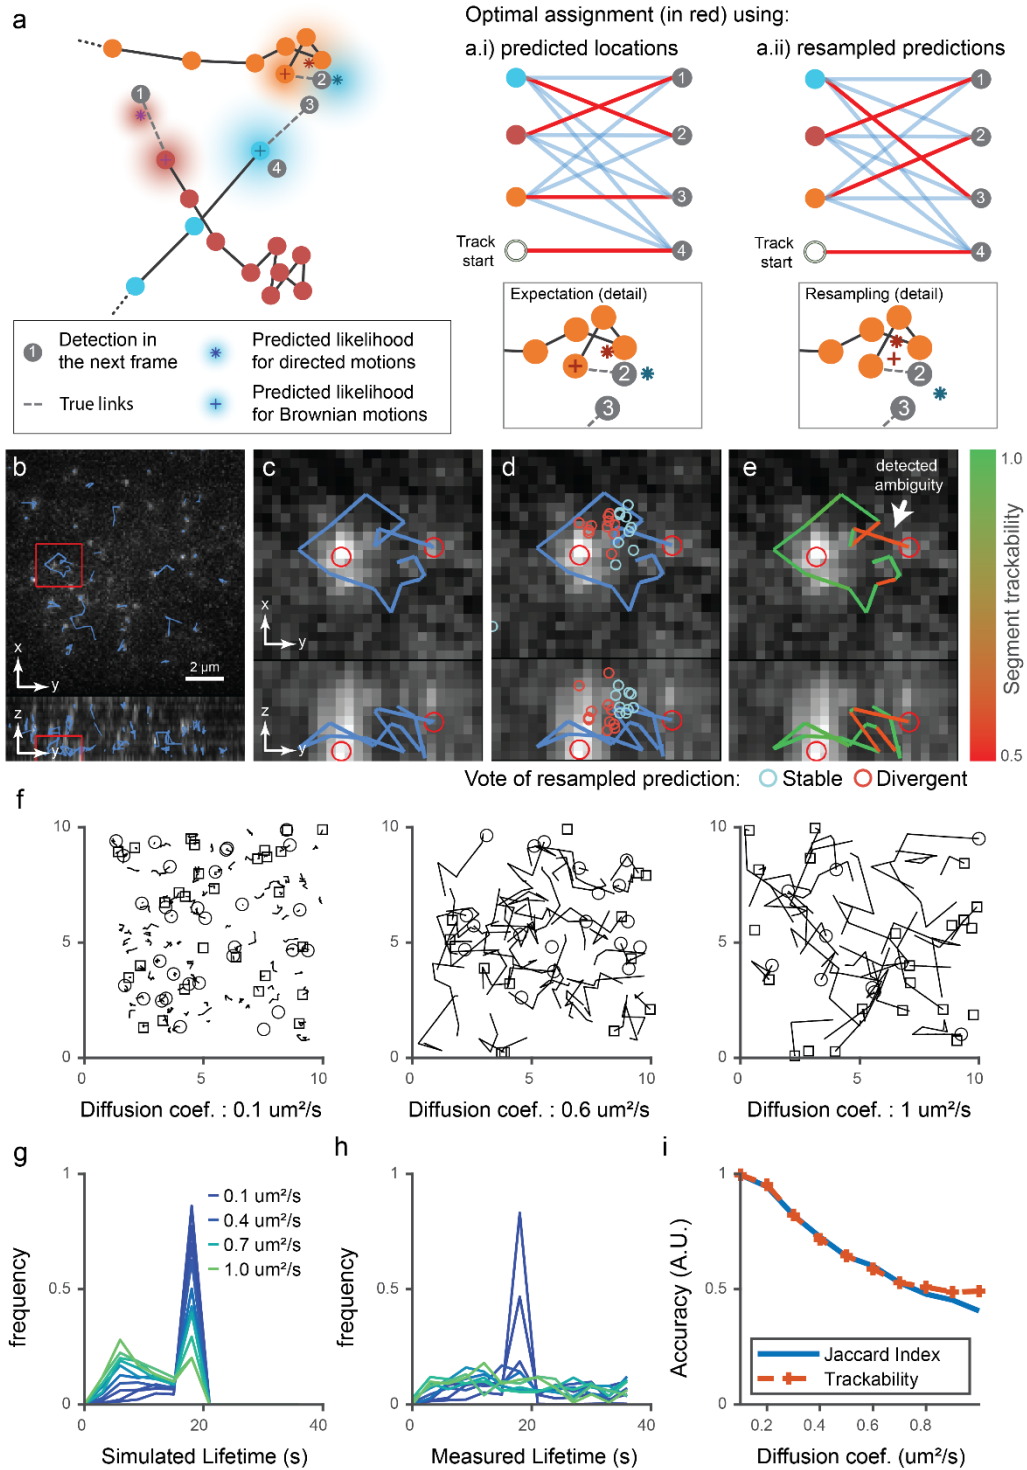

325

326

327

**Figure 5:** The trackability score relies on the stochastic footprint of each trajectory to infer tracking accuracy. a) Example of a tracking ambiguity due to three trajectories in close proximity (orange, blue and red). Dashed lines represent the true motion between track heads at time  $t - 1$  and detections at time  $t$ , represented by gray dots. Colored gradients represent the likelihood of each expected particle location at time  $t$ , estimated using the history of positions up to time  $t - 1$  and considering multiple motion model hypotheses. The optimal assignment between the expected and detected particle positions at time  $t$  in this case yields an erroneous assignment from the orange track head to detection 2 and from the blue track head to detection 3 (graph a.i) . Resampling of the expected locations results in a new assignment (graph a.ii), this time without error. b) Orthogonal Maximum Intensity Projection (MIP) of Embryonic Stem (ES) cells expressing eGFP- labelled Sox2 molecules imaged by Multifocus Microscopy. Overlaid boxes highlight the ROI enlarged in c – e). c) Orthogonal MIP of ROI. Overlay shows a trajectory where two close detections create assignment ambiguity. d) Overlay illustrates the stochastic resampling of the predicted particle positions at this time-point; blue circles: assignments in agreement with the original solution; red circles: assignments that differ from the original solution. e) Overlay shows trajectory segments colored according to estimated trackability scores. g) Examples of simulated trajectories with diffusion coefficients ranging from  $0.1 \text{ um}^2/\text{s}$  to  $1 \text{ um}^2/\text{s}$  with a fixed particle density of  $0.1 \text{ um}^{-3}$ . Visualization is limited to five consecutive frames to reduce clutter. f) Lifetime of simulated trajectories (the change in distribution is due to trajectories leaving the field of view as the diffusion coefficient increases). h) Lifetime distribution measured through tracking shows a loss of the original distributions when the diffusion coefficient exceeds  $0.2 \text{ um}^2/\text{s}$ . i) Accuracy measured through the jacquard index (JI, blue); the trackability score (orange, dashed), which is derived without external ground truth, closely follows the JI up to a diffusion coefficient  $0.6 \text{ um}^2/\text{s}$  beyond which tracking is random.

328

329

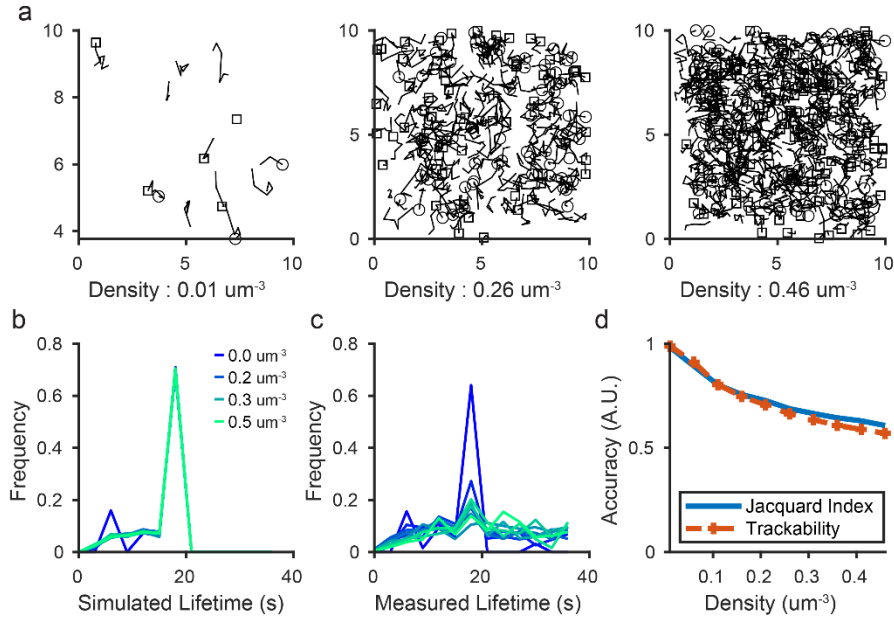

**Supplementary Figure 2:** The trackability score predicts the performance decrease associated to particle density.

a) Examples of simulated trajectories with particle density ranging from 0.01 to 0.5  $\mu\text{m}^{-3}$  with a fixed diffusion coefficient of 0.3  $\mu\text{m}^2/\text{s}$ . Visualization is limited to five consecutive frames to reduce clutter. b) Lifetime of simulated trajectories. c) Lifetime distribution measured through tracking. d) Accuracy measured through the jacquard coefficient on the ground truth and estimated with the trackability score using the detection set.

330

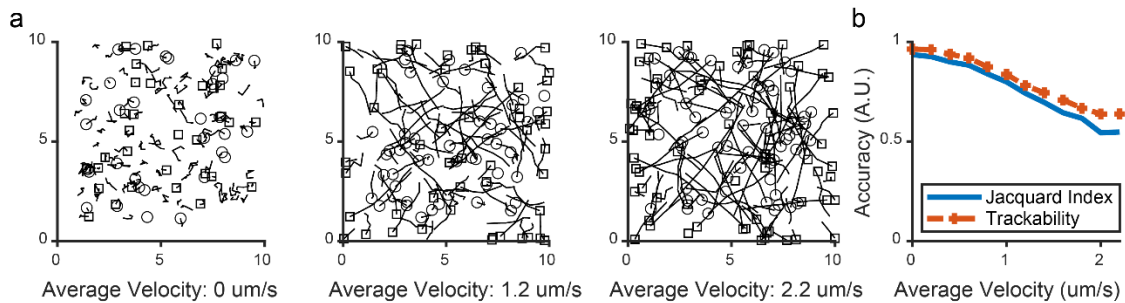

**Supplementary Figure 3:** The trackability score predicts the decrease in performance associated to particle velocity. a) Examples of simulated trajectories presenting directed motions described by velocities ranging from 0 to 2.2  $\mu\text{m}/\text{s}$  with a fixed diffusion component coefficient of 0.15  $\mu\text{m}^2/\text{s}$  and density set to 0.1  $\mu\text{m}^{-3}$ . Visualization is limited to five consecutive frames to reduce clutter. b) Accuracy measured through the jacquard coefficient on the ground truth and estimated with the trackability score using the detection set.

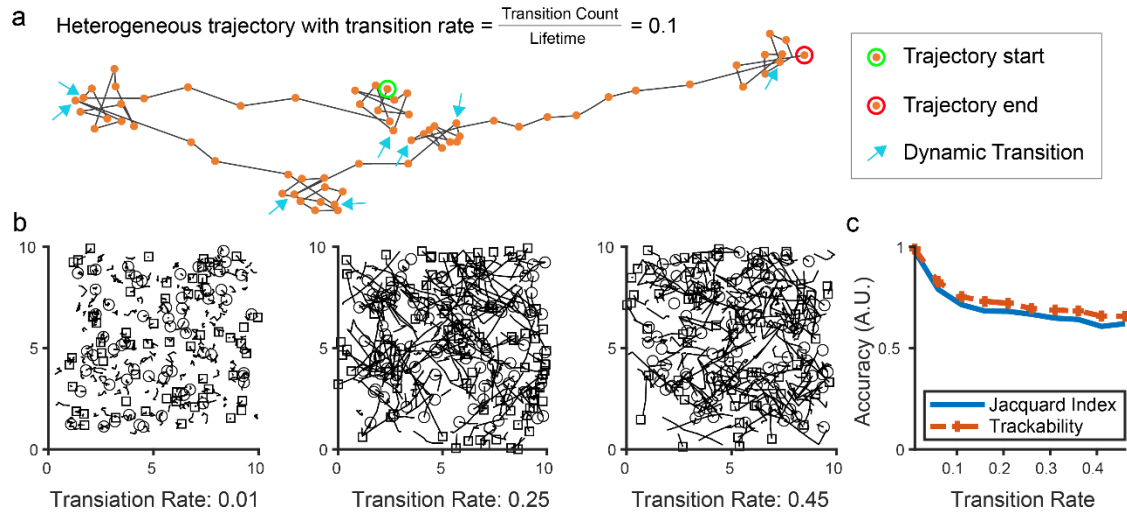

**Supplementary Figure 4:** The trackability score predicts the decrease in performance associated to the heterogeneity of motion types in a single trajectory. a) Illustration of the transition rate used to simulate a dataset with increasing heterogeneity. b) Examples of simulated trajectories with diffusive motion described by a coefficient set to  $0.1 \text{ } \mu\text{m}^2/\text{s}$ , and directed motion set to  $1.5 \text{ } \mu\text{m}/\text{s}$  with a diffusive component of  $0.1 \text{ } \mu\text{m}^2/\text{s}$ . Density is set to  $0.2 \text{ } \mu\text{m}^{-3}$ . Visualization is limited to five consecutive frames to reduce clutter. c) Accuracy measured through the jacquard coefficient on the ground truth and estimated with the trackability score using the detection set.

332 The trackability score can be used to compare tracking quality across time, space and  
333 fluorescent channels.

334 In order to evaluate the performance of the trackability score in indicating high vs low confidence in  
335 experimental tracking results, we first analyzed the spatiotemporal variation in the tracking quality of  
336 endocytic pits moving along a dynamic membrane (see Section “Endosome trackability on cell cultured  
337 on top of collagen” in Material and Methods). The cells were plated on collagen and imaged at high-  
338 resolution using diagonally swept light-sheet microscopy<sup>2</sup>. The acquisitions present a large variety of  
339 dynamic behaviors, from a quiescent membrane in the center to rapid protrusive displacements at the

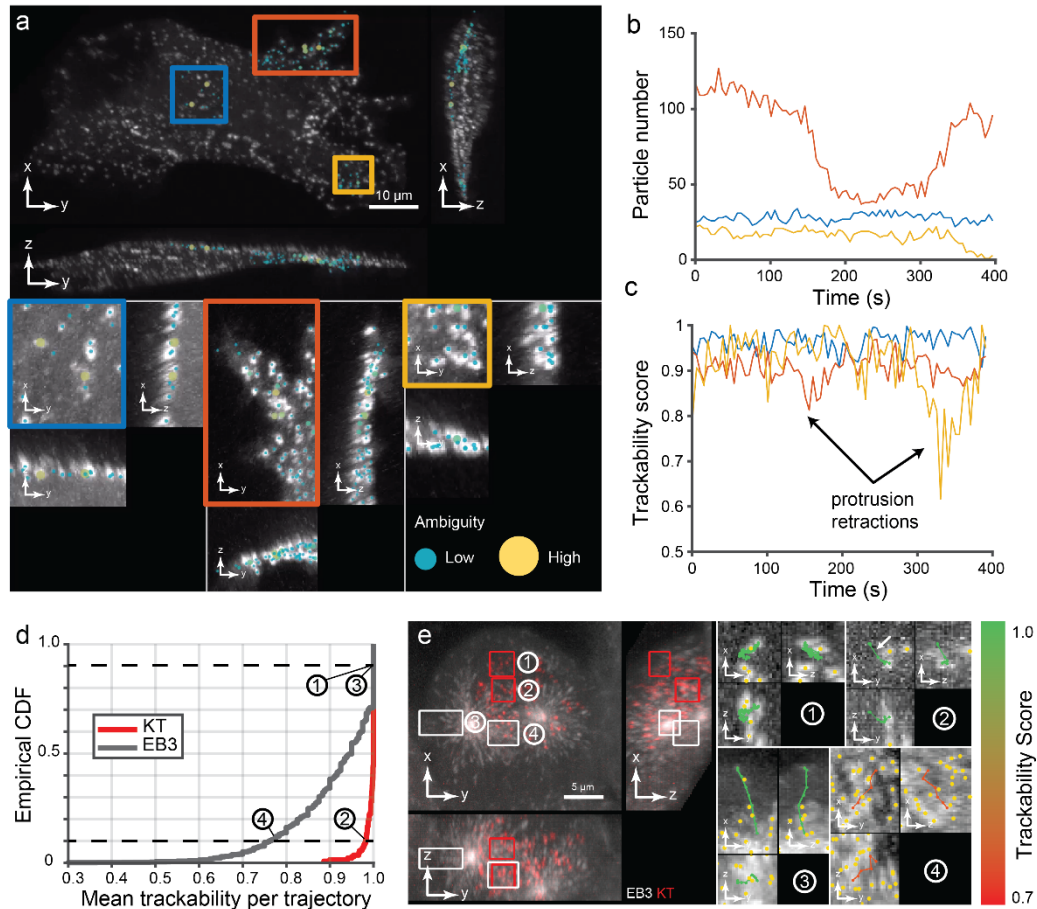

**Figure 6:** Demonstration of trackability score on experimental data. a) Orthogonal MIP of breast cancer cells imaged with diaSLM expressing eGFP-labelled alpha subunit of the AP-2 complex. Boxes show ROIs with different types of activity. Dot overlays show local level of ambiguity. b) Number of track segments over time for the three ROIs (N=1 cell). c) Trackability score over time for the three ROIs (N=1 cell). d) Cumulative distribution of the average trackability score of trajectories for both EB3 and Kinetochores sampling the dynamics of the mitotic spindle shown in Fig 4. e) Four ROIs (two for each channel) showing trajectories colored according to their mean trackability score. Trajectories were selected near the 10th and 90th percentiles of the cumulative distribution. Yellow dots show surrounding detections.

340 leading edge (Fig. 6.a). To selectively analyze those areas, we manually selected dynROIs to capture a  
 341 quiescent area, a slow protrusion-retraction cycle and a fast protrusion-retraction cycle. Since both the  
 342 cell and its environment are moving, those dynROIs were selected within a larger dynROI built from all  
 343 the trajectories detected (see Movie 11). The trackability score shows a consistently high score in the

344 quiescent dynROI, a large and transient decrease in trackability around the fast protrusive motion and  
345 an average decrease in the slower protrusion (Fig 6.b,c). Our score is thus able to accurately reflect the  
346 variation in trackability across space and time and detect time points when tracking ambiguity arises due  
347 to rapid movement at the level of the whole cell.

348 In a second experiment we tested the capacity of our trackability score to compare tracking quality in a  
349 complex scene with heterogeneous cellular structures. We analyzed the spindle assembly dataset shown  
350 in Fig 4.f-h with labelled microtubule plus-ends and kinetochores. The cumulative distributions of  
351 trajectory-averaged trackability scores showed that kinetochore trajectories overall are more reliably  
352 reconstructed compared to microtubule plus-end trajectories (Fig 6.d), consistent with their much lower  
353 density and slower motion. Our score also enables the analysis of trackability on a per-trajectory basis.  
354 Indeed, trajectories with a trackability score near the 90th percentile of the cumulative distribution  
355 appear to be error-free for both plus-end and kinetochore channels (Fig. 6.e). In contrast, a plus-end  
356 trajectory with a score near the 10<sup>th</sup> percentile shows a likely erroneous path in an area of very high-  
357 density, crisscrossing microtubules. Because of the overall much higher trackability of the kinetochore  
358 channel, the 10<sup>th</sup> percentile of the trackability score distribution of these trajectories picks out a  
359 trajectory with only one likely wrong link (see arrow) caused by false positive particle detection. Based  
360 on these examples we conclude that the trackability score is a faithful reporter of the overall accuracy of  
361 tracking results in a given imaging channel, and it further assists selection of correctly tracked objects in  
362 a dense population of trajectories.

## 363 Discussion

364 We report here a new version of the popular tracking framework u-track, which now enables the study  
365 of particle dynamics in 3D live microscopy and tackles key challenges in the exploration and analysis of  
366 those complex datasets. First, we demonstrate the 3D implementation of the particle trajectory



367 reconstruction in space and time, including several particle motion models that support particle tracking  
368 in a variety of imaging and biological scenarios. We demonstrate applications of the u-track 3D software  
369 to the measurement of lifetimes of endocytic events, of microtubule growth dynamics, and of the stop-  
370 and-go behavior of individual transcription factors binding to chromatin. We introduce dynROIs, which  
371 unveil local particle behaviors embedded in highly dynamic sub-cellular processes that would otherwise  
372 be buried in global renderings of the 3D trajectories. We illustrate these functionalities across scales,  
373 from the cell-wide heterogeneity of adhesions in a collagen-embedded cell, to the microscale  
374 organization of microtubules during chromosome capture. Finally, we introduce a strategy for automatic  
375 detection of tracking ambiguities that pinpoints the locations and times of potential tracking errors in  
376 the full set of reconstructed trajectories. We demonstrate the approach on simulations and  
377 experimental datasets ranging from mapping the spatial heterogeneity of tracking quality in the  
378 quantification of endocytic events, to the automatic identification of high- and low-quality trajectories  
379 imaged in the mitotic spindle. Thus, u-track 3D complements the development of light-sheet  
380 microscopy with a much-needed tool set for the exploration and the quantitative analysis of the  
381 biological processes these movies capture.

382 The u-track 3D software is implemented in Matlab and distributed with a user-friendly GUI and tutorial  
383 scripts. The GUI is designed for testing the software and for the interactive visualization of the particle  
384 detections, trajectories and dynROI locations overlaid onto the raw data. In particular, both raw voxels  
385 and measurements can be observed using either slice-by-slice visualization or maximum intensity  
386 projections in the frame of reference of the laboratory or in a frame of reference of a dynamic region of  
387 interest. The scripts are primarily used for batch processing and analysis at scale, and they enable the  
388 systematic visualization of tracking results across a full dataset with a newly designed renderer. As  
389 opposed to traditional interactive rendering, our engine is designed for the fully automated and  
390 parallelized rendering of raw data and overlaid measurements that takes advantage of the

391 asynchronous nature of processing jobs. Montages of raw and overlaid images can be easily specified  
392 and saved in a variety of formats (png, avi and gifs). As an example, all of the panels in Figure 4  
393 presenting microscopy data have been produced by this rendering engine. The script interface also  
394 provides a finer control of the shape of dynROIs than the GUI (cone, tube, rounded tubes etc ...). Finally,  
395 both detection and tracking can be limited to those dynROIs, enabling the rapid adjustment of algorithm  
396 parameters before processing the full dataset and tracking in a more appropriate frame of reference.  
397 Two datasets are provided to test the software, one extracted from the endocytosis imaging introduced  
398 in Figure 6.a, the other extracted from the mitosis imaging experiment introduced Figure 4.

399 While the robustness and wide applicability of the software already has been tested in several  
400 studies<sup>24,26</sup>, many challenges remain toward a generic approach for the automated exploration of 3D  
401 sequences. A chief bottleneck comes with the multiple sources of motions occurring across scales,  
402 especially in more physiologically relevant environments with a high degree of freedom. Indeed, while a  
403 given framerate may be sufficient to sample and track the motion of particles on a static substrate, the  
404 object may not be trackable when the particle-embedding volume moves rapidly. U-track 3D addresses  
405 this problem with the estimation of dynamic regions of interest, which allow the pre-alignment of  
406 particle groups associated with an entire cell or subcellular structure on a coarser scale for refined  
407 tracking of individual particles on a finer scale. However, the automated estimation of the scale, type,  
408 clusters and magnitude of those displacements remains an open problem for heterogeneous groups of  
409 objects. New developments in stochastic filtering approaches for multiscale displacements are thus  
410 necessary. Recent progress in neural networks to mimic Bayesian approaches are promising<sup>27,28</sup> and  
411 could also be adapted to a multiscale representation. Another key challenge in the analysis of dynamic  
412 3D data is the quantification of the motion of diffuse signaling molecules or macromolecular structures  
413 that do not present a well-defined particle in the imaged volume. These motions can be estimated  
414 coarsely using 3D optic flow approaches for which a few promising methods tailored to fluorescence

415 imaging have been proposed<sup>29-31</sup>. Finally, the visualization and interaction with large multidimensional  
416 data remains difficult. In this paper we propose to remove any direct manipulation of the virtual camera  
417 to direct the rendering through automatically defined dynROI. While we do believe this is the future of  
418 3D sequence exploration, the underlying rendering engine is limited to maximum intensity projections  
419 or slide-by-slide visualization. Community efforts are currently underway to provide a generic and  
420 versatile graphic library along with GUI interface such as Napari<sup>32</sup> and Sciview<sup>33</sup>. They could complete  
421 the capabilities of our renderer with more advanced volumetric rendering (alpha, ray casting) as well as  
422 surface rendering. We thus introduce u-track as a feature-complete software for the quantification and  
423 analysis of 3D trajectories, but also as a steppingstone toward the automated exploration of any types  
424 of dynamic datasets. In the meantime, as we deliver the software to the community, we are  
425 continuously improving the software by fixing bugs and evaluating suggestions for improvements made  
426 by the community.

## 427 Authors contributions

428 P.R. and G.D. designed the research. P.R. wrote the tracking and rendering software, and performed  
429 data analysis. Q.Z. developed the software's graphical user interface. W.R.L., K.M.D., A.D., T.I. and,  
430 E.S.W. performed the biochemical and imaging experiments. K.M.D., R.F. and E.B. provided imaging  
431 resources. P.R. and G.D. wrote the manuscript. All authors read and provided feedback on the final  
432 manuscript.

## 433 Acknowledgments

434 The authors are grateful to Yuko Mimori-Kyosue at the RIKEN Institute for the gift of the HeLa cells  
435 expressing eGFP-EB1 and fruitful conversations. We are also grateful to Zhe Liu at Janelia Research  
436 Campus for giving the E.S. cells. P.R. has been funded by the fellowship LT000954/2015 from the Human  
437 Frontiers in Science Program and the « Investissements d'Avenir » French Government program

438 managed by the French National Research Agency (ANR-16-CONV-0001) and from Excellence Initiative  
439 of Aix-Marseille University - A\*MIDEX.”. Work in the Danuser lab has been funded by the grant  
440 R35GM136428. W.R.L. acknowledges support from the Searle Scholars Program, the Beckman Young  
441 Investigator Program, an NIH New Innovator Award (DP2GM136653) and the Packard Fellows Program.  
442 K.M.D receives partial salary support from R01MH120131, R34NS121873, and R01DK127589. Research  
443 in the laboratory of D.W.G. has been supported by the Vienna Science and Technology Fund (WWTF;  
444 project nr. LS14-009), and by the Austrian Science Fund (FWF special research program SFB  
445 “Chromosome Dynamics”; project nr. SFB F34-06). R.F. has been supported by the Cancer Prevention  
446 Research Institute of Texas (RR160057), and the NIH (R33CA235254 and R35GM133522). Lattice light-  
447 sheet imaging of the mitotic spindle data produced in collaboration with the Advanced Imaging Center,  
448 a facility jointly supported by the Gordon and Betty Moore Foundation and Howard Hughes Medical  
449 Institute at the Janelia Research Campus.

## 450 [Data and code availability](#)

451 The latest version of the software described here, a user’s guide for both GUI and scripts and test  
452 datasets are available from <https://github.com/DanuserLab/u-track3D>. The data that support the  
453 findings of this study are available from the corresponding authors upon reasonable request.

## 454 [Materials and methods](#)

455

### 456 [Multiscale particle detector](#)

457 Three-dimensional microscopy imposes specific constraints to the design of a particle detector. First, the  
458 diversity of shapes and sizes of intracellular structures may not be visible to the naked eye in a  
459 volumetric rendering, we must thus design a detector that is responsive to those variations. Second,  
460 light scattering and variation in signal intensity create large changes in signal-to-noise ratio (SNR) across  
461 space that are also difficult to assess visually. Our detector must then be adapted to those changes from

462 low to high SNR. Finally, the large dimension of 3D data sets requires the design of computationally  
 463 efficient approaches. Following, we describe a multiscale detector equipped with an adaptive  
 464 thresholding approach that tests multiple possible scales at each location through the implementation  
 465 of multiple iterations of filtering.

466 We first developed a multiscale adaptive thresholding approach inspired by our previous work focused  
 467 on the sensitive detection limited to the case of diffraction-limited fluorescent structures<sup>16</sup>. Let us  
 468 consider the following image model

$$469 \quad M(\mathbf{x}, A, \sigma, \mu, C) = A(\mathbf{x})G_{\sigma, \mu}(\mathbf{x}) + C(\mathbf{x}) + \epsilon(\mathbf{x})$$

470 where  $A$  denotes the spot amplitude,  $\mathbf{x}$  the 3D position,  $G_{\sigma, \mu}(\mathbf{x})$  is a Gaussian function with standard  
 471 deviation  $\sigma$  and mean  $\mu$ ,  $C$  is the background signal and  $\epsilon(\mathbf{x})$  is the additive noise following a Poisson-  
 472 Gaussian stochastic footprint. The least-square formulation of our optimization problem as

$$473 \quad \operatorname{argmin}_{A(\mathbf{x}), C(\mathbf{x})} \sum_{\mathbf{x} \in W} \left( A(\mathbf{x})G_{\sigma, \mu}(\mathbf{x}) + C(\mathbf{x}) - I(\mathbf{x}) \right)^2,$$

474 where  $I(\cdot)$  denotes the image volume and  $W$  is a 3D box of size  $8\sigma$ , can be simplified to the resolution of  
 475 a linear system that can be decomposed in multiple filtering passes:

$$476 \quad A(\mathbf{x}_0) = \frac{(I * G_{\sigma, 0})(\mathbf{x}_0) - \overline{(G_{\sigma, 0} * \mathbf{1}_W)}(\mathbf{x}_0)}{n\overline{G_{\sigma, 0}^2} + n\overline{G_{\sigma, 0}^2}}$$

477 and

$$478 \quad C(\mathbf{x}_0) = \frac{(I * \mathbf{1}_W)(\mathbf{x}_0) - n\overline{G_{\sigma, 0}}A(\mathbf{x}_0)}{n}$$

479 where  $\mathbf{x}_0$  is the fixed voxel position  $\mathbf{1}_W$  is a unitary convolution kernel along  $W$ ,  $n$  is the number of voxel  
 480 encompassed in  $W$ . The statistical analysis of the local residuals resulting from the fit

$$481 \quad r(\mathbf{x}) = \left( A(\mathbf{x}_0)G_{\sigma, \mu}(\mathbf{x}) + C(\mathbf{x}_0) - I(\mathbf{x}) \right),$$

482 with  $\mathbf{x} \in W$ , provides a p-value-based threshold for testing for the hypothesis that  $A(\mathbf{x}_0) \gg C(\mathbf{x}_0)$  as  
 483 described in<sup>16</sup>. This approach yields a sensitive binary map  $H_{0, \sigma}(\cdot)$  for the detection of the voxel

484 describing a fluorescence object at scale  $\sigma$ . This approach avoids the fitting of an object template in  
485 order to reduce computation time.

486 Next, we carry out this adaptive thresholding step at multiple scale to obtain a vote map.

$$487 \quad V(\mathbf{x}) = \sum_{\sigma \in \Omega} H_{0,\sigma}(\mathbf{x})$$

488 where  $\Omega$  is the scale range, typically ranging between 120 nm and 1  $\mu\text{m}$ . The resulting object mask  $V(\cdot)$

489 thus summarizes the presence of particles at any scale at a given voxel (see Supp. Fig. 3) using only

490 filtering operations that can process each voxel in a parallelized fashion. In order to refine the

491 localization of objects present in contiguous object masks, we implemented a multiscale Laplacian of a

492 Gaussian filtering framework<sup>34</sup> to estimate a map of scale response  $S(\cdot)$  for each voxel defined as:

$$493 \quad S(\mathbf{x}) = \underset{\sigma \in \Omega}{\operatorname{argmax}} \sigma^2 \nabla^2 (I(\mathbf{x}) * G_{\sigma,0}(\mathbf{x}))$$

494 where  $\nabla^2(\cdot)$  denotes the Laplacian operator. The watershed algorithm is then applied to further

495 segment this scale response map to detect touching objects. The center of object is determined through

496 the weighted centroid of the voxels belonging to a same object mask.

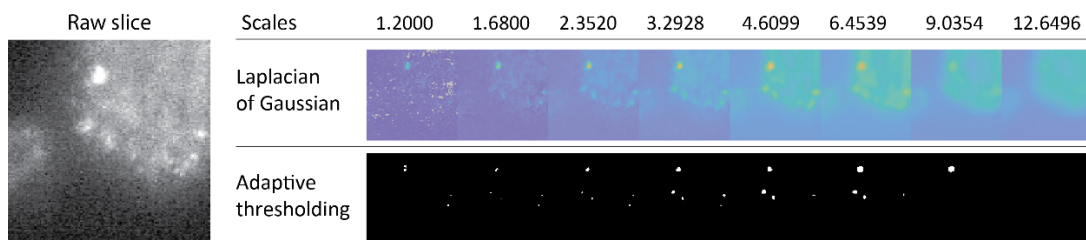

497 **Supplementary Figure 5:** Principle of multiscale Laplacian-of-Gaussian filtering (top) and multiscale  
498 adaptive thresholding approach (bottom) demonstrated on a slice of a volumetric imaging of cellular

499 adhesions (detail).  
500

501

## 502 [Dynamic Region of Interest estimation](#)

503

504 In order to visualize and map the molecular processes nested in volumetric time lapse sequences, we

505 propose a framework for the definition of dynamic regions of interest (dynROI) from point cloud

506 sequences. Those dynROIs are described by dynamic bounding boxes (or rectangular cuboids) that are  
507 sized to fit the data optimally and oriented according to a moving frame of reference. In this note, we  
508 describe the general principles underpinning the estimation of those dynROIs from dynamic point clouds  
509 and their implementation across scales: from cellular down to molecular dynROIs.

#### 510 [Generic point cloud tracking principle](#)

511 We first define an optimal frame of reference in the first time point of the sequence with an origin  $O_0$   
512 described by the average point cloud position and with unit vectors  $(u_0, v_0, w_0)$  described by the  
513 eigenvectors of the covariance matrix of the point positions (a.k.a. principal component analysis). The  
514 orientation of the dynROI box in the first frame is described by this frame of reference and its size is  
515 defined by the boundaries of the point cloud augmented by a tunable margin (default is set to 5 voxel).  
516 The frame of reference at time  $t$  is then estimated through a rigid transform as:

$$518 \quad (O_t, R_t) = \underset{\substack{x_t \in \Omega_t \\ x_0 \in \Omega_0}}{\operatorname{argmin}} \sum \|x_t - (R_t x_0 + O_t)\|$$

519 using the Iterative closest point algorithm<sup>35</sup>, where  $\Omega_t$  denotes the set of points coordinate at time  $t$ .  
520 The unit vector  $(u_t, v_t, w_t)$  are then estimated by applying the rigid transform to  $(u_0, v_0, w_0)$ . At each  
521 time point the size of the box is adjusted to fit the extension of the current point cloud in the current  
522 orientation with the additional margin. Multiple dynROI shapes have then been implemented to adjust  
523 to the local process (box, sphere, tube, rounded tube, plane and cone).

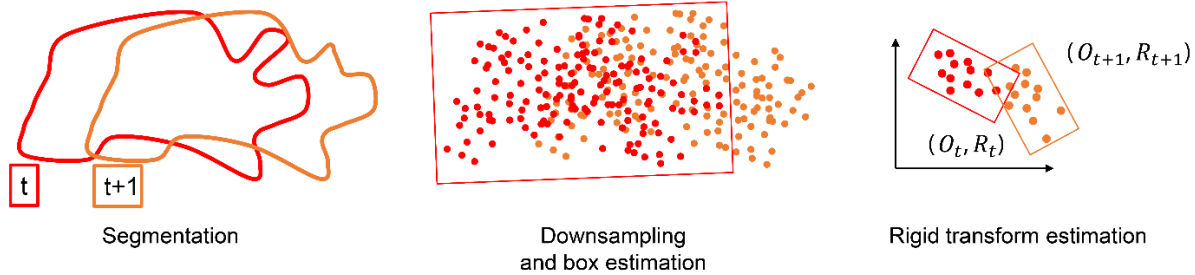



544 a Brownian motion model with a maximum instantaneous displacement set to 5 times the process noise  
545 estimated by Kalman filtering of the trajectory, a lower bound set at 0.4  $\mu\text{m}$  and upper bound set at 0.6  
546  $\mu\text{m}$ . Variation in SNR were managed with a maximum gap set to 4 s (or frames) with a minimum length  
547 of 2 s for the track segment. The dynROI was estimated using the generic point cloud tracking principles  
548 described in Section 5.1 using all the trajectories detected inside the spindle dynROI with a box-shaped  
549 dynROI and a margin of 0.1  $\mu\text{m}$ .

#### 550 Dynamic region of interest estimation for the interpolar region

551 Let  $(O_t^s, u_t^s, v_t^s, w_t^s)$  and  $(O_t^k, u_t^k, v_t^k, w_t^k)$  denote the frames of reference estimated for the spindle and  
552 the chromosome respectively. We want to build a frame of reference  $(O_t^i, u_t^i, v_t^i, w_t^i)$  that follows an  
553 interpolar plane showing how microtubule nucleation events inside the spindle are orchestrated to  
554 capture chromosomes efficiently. We first set the origin to  $O_t^i = O_t^s$  and  $w_t^i = w_t^s$  so that one axis is  
555 following the spindle at all time. For the plane to describe the motion of the chromosome population,  
556 the second unit vector follows a slice of the kinetochore-associated dynROI  $v_t^{k'} = \cos(\theta) u_t^k +$   
557  $\sin(\theta) w_t^k$  projected to ensure orthogonality as  $v_t^i = v_t^{k'} \cdot (1 - w_t^{i\text{T}} w_t^i)$ . Finally the last unit vector is  
558 set as  $u_t^i = v_t^i \times w_t^i$ . The dynROI type is a plane with a lateral fringe of 50 voxels, a height of 4 voxels  
559 and an angle  $\theta$  set to  $\frac{\pi}{2}$ .

#### 560 Dynamic region of interest estimation for the Kinetochore fibers

561 Assuming K-fibers to span the region between poles and kinetochores as a straight polymer, its  
562 associated microtubule dynamics was observed using a conical dynROIs with an angle of  $\pi/12$ .

#### 563 Stochastic programming for the evaluation of trackability

564 The association of particle detections with trajectory heads is performed in a temporally greedy fashion,  
565 i.e. particles detected at time  $t$  are linked to the heads of track segments defined up to time  $t -$   
566 1 without consideration of the track segments beyond  $t$  and only indirect consideration of track

567 segment before  $t-1$ . Therefore, our definition of trackability relates to the level of ambiguity in assigning  
568 particles detected in time point  $t$  to track segment heads in  $t-1$ . The optimal association is obtained by  
569 linear assignment of heads to particles in a bi-partite graph:

$$570 \quad \underset{\{a_{ij}\}}{\operatorname{argmin}} \sum_{i \in \Omega, j \in D_t} c_{ij} a_{ij} \quad \text{s.t.} \quad \sum_{i \in \Omega} a_{ij} = 1 \quad \text{and} \quad \sum_{j \in D_t} a_{ij} = 1,$$

571 where  $\Omega$  is the set of track segment heads,  $D_t$  is the set of detections measured at time  $t$ ,  $a_{ij} \in \{0,1\}$   
572 denotes the assignment of the  $i$ th track segment to the  $j$ th particle and  $c_{ij} \in \mathbb{R}$  is the cost associated to  
573 making that association. The association cost  $c_{ij}$  typically reflects the distance between the predicted  
574 location of the  $i$ th track segment at  $t$  and the  $j$ th detection at this same time point. This assignment  
575 problem is convex, hence with a guaranteed unique solution, and can be solved using a variety of linear  
576 programming algorithms<sup>15,36,37</sup>. However, a key challenge in our framework is the deterministic aspect  
577 of this solution. There is no measure of uncertainty attributed to the final graph of associations (see Fig  
578 5.a). While several algorithms have been proposed to estimate the uncertainty related to the total  
579 optimal cost of a linear programming problem, a.k.a. stochastic programming<sup>38</sup>, they do not focus on the  
580 detection of local changes in association made in the bi-partite graph. In this Section, we will first detail  
581 how we consider the randomness present in the history of each track to estimate the probability  
582 distribution associated to all assignment costs  $c_{ij}$ . We will then describe how these uncertainties can  
583 then be exploited to detect local ambiguities in the assignment problem, which subsequently define a  
584 score of trackability.

585 Stochastic filtering approaches are routinely used to estimate the parameter describing the dynamic  
586 properties of tracked particles from their position history. They enable the prediction of particle  
587 location from one frame to the next to refine the cost used for linear assignment. Those temporally  
588 recursive algorithms also provide inferences of track segment prediction uncertainty from  $t-1$  to  $t$ .

589 Briefly, let  $\mathbf{x}_t$  be a variable describing the state of the track segment. For a particle moving in a directed  
590 fashion, it is defined as:

$$591 \quad \mathbf{x}_t = (x, y, z, dx, dy, dz).$$

592 The associated probability  $p(\mathbf{x}_t|\mathbf{z}_{1:t})$  can be estimated recursively thanks to the Bayes rule:

$$593 \quad p(\mathbf{x}_t|\mathbf{z}_{1:t}) \propto p(\mathbf{z}_t|\mathbf{x}_t) \int p(\mathbf{x}_t|\mathbf{x}_{t-1})p(\mathbf{x}_{t-1}|\mathbf{z}_{1:t-1}) d\mathbf{x}_{t-1},$$

594 where  $\mathbf{z}_{1:t}$  represents the past measured positions assigned to a particular track. Kalman filtering is a  
595 scalable and flexible way to model the motions of thousands of particles in parallel, and as such is used  
596 in the majority of tracking approaches<sup>7</sup>, including u-track. In this framework, the relationships between  
597 random variables are assumed to be linear and described as follows:

$$598 \quad \mathbf{x}_t = \mathbf{F}\mathbf{x}_{t-1} + \mathbf{w}_t$$

$$599 \quad \mathbf{z}_t = \mathbf{H}\mathbf{x}_t + \mathbf{v}_t$$

600 where  $\mathbf{F}$  is the state transition matrix between consecutive time points,  $\mathbf{H}$  is the observation matrix,  
601 and  $\mathbf{w}_t$  and  $\mathbf{v}_t$  are the model and measurement noise respectively, both assumed to be Gaussian with  
602 covariance matrices  $\mathbf{Q}_t$  and  $\mathbf{R}_t$ . The Gaussian and linear assumption provides an analytical solution  
603 with a computationally efficient implementation to estimate  $p(\mathbf{x}_t|\mathbf{z}_{1:t}) \sim N(\hat{\mathbf{x}}_t, \hat{\mathbf{P}}_t)$  (see our previous  
604 work<sup>14</sup> for a detailed review). Before optimal assignment between a track segment at  $t - 1$  and the  
605 object detected on frame  $t$ , the probability distribution of the predicted particle position at time  $t$  is then  
606 described by  $p(\mathbf{x}_t|\mathbf{z}_{1:t-1}) \sim N(\mathbf{F}\hat{\mathbf{x}}_{t-1}, \mathbf{F}\hat{\mathbf{P}}_{t-1}\mathbf{F}^\top + \mathbf{Q}_t)$ . As such the variation of the cost to associate the  
607  $i$ th track segment to the  $j$ th measurement can be expressed, without loss of generality as:

$$608 \quad c_{ij} \sim \|\mathbf{H}\mathbf{x} - \mathbf{z}_t^j\| \text{ s. t. } \mathbf{x} \sim p(\mathbf{x}_t^i|\mathbf{z}_{1:t-1}^i).$$

609 This expression provides us with a direct way to explore the space of possible combination of cost values  
610 through Monte Carlo Simulations. U-track 3D implements several types of stochastic filtering  
611 approaches such as unimodal and multimodal Kalman filtering as well as piecewise stationary motion  
612 filtering or smoothing approaches, where the same principles can be straightforwardly applied.

613 The principle underlying the use of our predicted probability distribution to evaluate assignment  
 614 stability is described graphically in Figure 5. Our local trackability score is defined as:

615 
$$T_t^i = \frac{1}{N} \sum_{n=1}^N [a_{ij^*} = a_{ij^n}]$$

616 where  $a_{ij^*}$  is the initial assignment found for the  $i$ th trajectory,  $a_{ij^n}$  is a newly computed assignment  
 617 resulting from the  $n$ th out of a total of  $N$  simultaneous resampling rounds of all costs  $c_{ij}$  and  $[\cdot]$  denotes  
 618 the Iverson bracket. Each new assignment result, or vote, is considered different if the track segment is  
 619 assigned to another detection, or determined to be a track termination. As such, a lower score  $T_t^i$  reflect  
 620 a larger instability in the optimal assignment, hence a higher ambiguity and lower trackability. In our  
 621 experiments, the number of resampling rounds is set to  $N = 20$ .

622 [Simulation parameters for trackability evaluation](#)

623 Parameters used to simulate the object described in Section “The trackability score detects tracking  
 624 ambiguities with high precision”.

| Varying parameter                    | Diffusion | Density              | Velocity             | Transition Rate      |
|--------------------------------------|-----------|----------------------|----------------------|----------------------|
| Figure                               | 5.f-i     | Supp 2               | Supp 3               | Supp 4               |
| Diffusion Coef. (um <sup>2</sup> /s) | 0.1 – 1.0 | 0.3                  | 0.15                 | 0.1                  |
| Density (um <sup>-3</sup> )          | 0.1       | 0.01 – 0.5           | 0.1                  | 0.2                  |
| Velocity (um/s)                      | 0         | 0                    | 0 – 2.2              | 1.5                  |
| Transition Rate                      | 0         | 0                    | 0                    | 0 – 0.5              |
| Volume size (um <sup>3</sup> )       | 1000      | 1000 um <sup>3</sup> | 1000 um <sup>3</sup> | 1000 um <sup>3</sup> |
| Frame rate (Hz)                      | 1         | 1                    | 1                    | 1                    |
| Movie Length (s)                     | 150       | 150                  | 150                  | 150                  |
| Trajectory lifetime (s)              | 20        | 20                   | 20                   | 20                   |

|                             |       |       |       |       |
|-----------------------------|-------|-------|-------|-------|
| Standard error on detection | 0.005 | 0.005 | 0.005 | 0.005 |
|-----------------------------|-------|-------|-------|-------|

626

627

## 628 [Clathrin-mediated endocytosis study on a glass coverslip](#)

### 629 [Cell preparation and imaging](#)

630 Inner medulla collecting duct (IMCD) mouse epithelial cells (ATCC CRL-2123) stably expressing alpha-  
631 adaptin GFP<sup>16</sup> were cultured in DMEM/F12 supplemented with 10% fetal calf serum and 1%  
632 antibiotic/antimycotic. Cells were plated on 5 mm diameter coverslips (64-0700, Thomas Scientific) and  
633 mounted to a custom machined holder for imaging with a high-NA version of diagonally scanned light-  
634 sheet microscopy<sup>2</sup>. This microscope is equipped with an NA 0.71 water dipping illumination objective  
635 (54-10-7, Special Optics), and a 25X/NA 1.1 water dipping detection objective (CFI75 Apo LWD 25XY,  
636 Nikon Instruments), and a Hamamatsu Flash 4.0 sCMOS camera. Briefly, 500 time points were acquired  
637 with 30 uW of 488 nm illumination (measured at the back pupil of the illumination objective) and a 15  
638 ms camera exposure. Each image stack was 106.5 x 39.9 x 23.1  $\mu\text{m}^3$ , with a lateral and axial voxel size of  
639 104 and 350 nm, respectively, resulting in a 1.008 Hz volumetric image acquisition rate.

### 640 [Clathrin structure trajectory estimation and post-processing](#)

641 Clathrin structure aggregates, labelled by alpha-adaptin GFP were detected using a multiscale particle  
642 detector with a p-value set to 0.05 and scales ranging from 0.15  $\mu\text{m}$  to 0.5 microns. For tracking, the  
643 motion of particles was modeled with a Brownian motion model with a maximum instantaneous  
644 displacement set as three times the process noise estimated by Kalman filtering of the trajectory, a  
645 lower bound set at 0.1  $\mu\text{m}$  and upper bound set at 0.3  $\mu\text{m}$ . When detection gaps are enabled, the  
646 maximum gap length is set to 3 s (or frames) with a minimum length of 3 s for any track segment  
647 allowable to be connected by the gap closing algorithm<sup>39</sup>.

648 The median of the maximum intensity reached per track was then used to discriminate between  
649 abortive and maturing CCPs. To account for the variation of fluorescence signal across acquisitions, the  
650 maximum intensities were scaled such that the empirical cumulative distribution function (cdf) of  
651 maximum intensities computed for each acquisition matched the median cdf of all acquisitions, as  
652 previously described in ref<sup>16</sup>.

### 653 [Microtubule instability measurement](#)

#### 654 [Cell preparation and imaging](#)

655 Cell preparation and imaging of microtubule plus-ends has been carried with Lattice Light-sheet  
656 microscopy as described in ref<sup>1</sup>.

#### 657 [Plus-ends trajectory estimation](#)

658 Plus-ends, labelled through GFP tagging of EB1, were detected using a multiscale detector with the  
659 default p-value (set to 0.005) and scales ranging from 0.15  $\mu\text{m}$  to 0.25  $\mu\text{m}$ . The polymerization of  
660 microtubule was modeled with a directed displacement estimated through a Kalman filtering of the  
661 trajectory, similar to<sup>18</sup>, but now in 3D. The random component of this displacement was estimated as 3  
662 times the process noise of the Kalman filter with a lower bound of 0.3  $\mu\text{m}$  and an upper bound of 0.6  
663  $\mu\text{m}$ .

664 The shrinkages and pauses detection framework proposed in<sup>18</sup> has also been translated to 3D plus-ends  
665 trajectories. The detection of both shrinkages and pauses is carried out by closing gaps between track  
666 segments, which implicitly delineate phases of microtubule growth. In our experiment, the minimum  
667 growth duration to consider gap closing was set to 4 s (or frames) and the maximum gap duration was  
668 set to 8 s. In order to detect pauses, the maximum angle between a speed vector estimated immediately  
669 prior and posterior to the pause event was set to 30 degrees, the maximum positional fluctuation in the  
670 plus-ends location during a pause is set to 0.5  $\mu\text{m}$ . To detect a shrinkage event between two segments,  
671 we first measure the distance D between the termination point of the earlier segment (which is

672 equivalent to the potential locus of a catastrophe event) and the initiation point of the later segment  
673 (which is equivalent to the potential locus of a rescue point) along the path of the earlier segment. The  
674 two segments are connected by the gap closer if the distance between the initiation point to the closest  
675 point along the trajectory of the first segment does not exceeds  $D\sin(\theta)$  with  $\theta$  set to 20 degrees in  
676 our experiment.

### 677 [Single molecule dynamics study with lattice light-sheet microscopy](#)

#### 678 [Cell preparation and imaging](#)

679 Cell preparation of fluorescently labelled Sox2 transcription factor for single molecule imaging is

680 described in ref<sup>1</sup>. Briefly, 100 time points were acquired with Lattice light-sheet microscopy imaging.

681 Nine planes spaced 500nm apart were acquired at 50 ms of camera exposure, resulting in a 2 Hz

682 volumetric image acquisition rate. Each image stack was  $50 \times 50 \times 5 \text{ um}^3$ , then cropped around the

683 nucleus, with a lateral and axial voxel size of 100 and 500 nm, respectively.

#### 684 [Estimation of transcription factor binding times](#)

685 Transcription factor single molecules were detected using a multiscale detector using a p-value of 0.01

686 and a scale ranging from 0.15 to 0.3 um. Transcription factor motion was modeled using a Brownian

687 motion model with a maximum instantaneous displacement estimated as 6 times the process noise

688 estimated by Kalman filtering of trajectory to account for speed variations during long periods of

689 confined diffusion, a lower bound set at 0.3 um and upper bound set at 0.5 um. The maximum gap is set

690 to 4 s (or frames) with a minimum length of 2 s for any track segment allowable to be connected by the

691 gap closing algorithm. We assume that if the single molecule is detectable it immobilized at the DNA.

692 Accordingly, characteristic binding times  $\tau$  are estimated by a double exponential fit to the lifetime

693 distribution.

### 694 [Adhesions and collagen interaction imaging and analysis](#)

#### 695 [Cell preparation and imaging](#)

696 For three-dimensional imaging of adhesions, mycoplasma-free U2OS cells were cultured in DMEM with

697 10% fetal bovine serum (Sigma; F0926-500ML) at 5% CO<sub>2</sub> and 37 °C. Cells were lentivirally transduced

698 with a truncated CMV promoter (Addgene #110718) driving the expression of mNeonGreen-Paxillin  
699 (Allele Biotechnology). Cells were seeded into a pH-neutralized collagen solution (~2 mg/mL) that, when  
700 polymerized, fully embedded cells in a three-dimensional extracellular matrix environment. For  
701 visualization of the extracellular matrix, a small concentration of the collagen was fluorescently  
702 conjugated with Alexa Fluor 568 NHS Ester (A20003, ThermoFisher). Samples were imaged with a high-  
703 NA variant of Axially Swept Light-Sheet Microscopy using 488 nm and 561 nm lasers for illumination  
704 (OBIS LX, Coherent, Inc.). The details of this microscope will be published elsewhere. Briefly, lasers are  
705 combined, spatially filtered, expanded, and shaped into a light-sheet with a cylindrical lens. This light-  
706 sheet was relayed to a bidirectional scan unit (6215, Cambridge Technology), a remote focusing system  
707 (CFI S Plan Fluor ELWD, Nikon Instruments), and eventually to the illumination objective (54-10-7,  
708 Special Optics). Fluorescence was detected in a widefield format with a water-dipping objective (CFI75  
709 Apo LWD 25SW, Nikon Instruments) and imaged onto two sCMOS cameras (ORCA-Flash4.0, Hamamatsu  
710 Photonics) with a 500 mm achromatic doublet (49-396, Edmund Optics), laser line filter, a dichroic, and  
711 bandpass filters (ZET405/488/561/640, ZT568rdc, ET525/50m, and ET600/50m, Chroma Technology  
712 Corporation). The laser laterally dithered for shadow reduction and scanned synchronously with the  
713 detection objective (P-603.1S2 and E-709.SRG, Physik Instrumente) to acquire a three-dimensional stack  
714 of images. All equipment was controlled with custom LabVIEW software, which is available from UTSW  
715 upon completion of a material transfer agreement.

#### 716 [Adhesion detection and elongation analysis](#)

717 Paxillin aggregates as a surrogate for adhesions were detected using the multiscale detector described in  
718 Section “Multiscale particle detector” based on a p-value of 0.001 and a scale ranging from 0.3 to 0.5  
719  $\mu\text{m}$ . The elongation of each detected adhesion is computed through a tubularity metric evaluated for  
720 each voxel and averaged across all the voxels associated to a single adhesion. Similar to the classic  
721 vesselness estimator by Frangi and colleagues<sup>40</sup>, our tubularity metric is based on the eigen values of the  
722 Hessian matrix to describe local curvature,. Let  $(\lambda_1 < \lambda_2 < \lambda_3)$  be the three eigenvalues of the Hessian



723 matrix computed at each voxel, the tubularity metric  $T = 1 - |\lambda_1/\lambda_2|$  yields a value between 0 and 1  
724 increasing with the elongation of the adhesions. As such, a noteworthy difference between the classic  
725 score described in Frangi's approach is the use of the two lowest eigen-values (associated with the two  
726 axis of lowest curvature direction) to discriminate between flat and elongated adhesions.

## 727 [Endosome trackability on cell cultured on top of collagen](#)

### 728 [Cell preparation and imaging](#)

729 Sum1590 breast cancer cells<sup>41</sup> stably expressing alpha-adaptin GFP were imaged similarly to the one  
730 plated on glass coverslip, with the exception that they were plated on a ~2 mm thick bed of rat tail-  
731 derived Collagen Type I (354236, Corning).

### 732 [Clathrin structure trajectory estimation](#)

733 Clathrin structure aggregates, labelled by alpha-adaptin GFP were detected using a multiscale particle  
734 detector with a p-value set to 0.01 and scales ranging from 0.125 to 0.5 microns. For tracking, the  
735 motion of particles was modeled with a Brownian motion model. In order to follow the erratic  
736 displacements caused by large protrusive motions, the maximum instantaneous displacement was set to  
737 5 times the process noise estimated by Kalman filtering of the trajectory, a lower bound set at 0.3 um  
738 and upper bound set at 0.6 um. The maximum gap length is set to 3 s (or frames) with a minimum length  
739 of 3 s for any track segment allowable to be connected by the gap closing algorithm<sup>39</sup>.

## 740 [Movies Descriptions](#)

### 741 [Movie 1](#)

742 Detail of a rat kidney cells layer expressing GFP-AP2 subunit imaged with diagonally scanned light-sheet  
743 microscopy (diaSLM) acquired with a volumetric frequency of 1 Hz and rendered with maximum  
744 intensity projection (MIP). Overlay highlights trajectories colored according to maturing events (green),  
745 aborting events (orange) and tracks discarded because their lifetimes are cut by the acquisition  
746 beginning and end (blue). The red spheres highlight gap location.

747 [Movie 2](#)

748 Details of HeLa cell in interphase expressing GFP-EB1 imaged with lattice light-sheet microscopy,  
749 rendered with MIP, and acquired with a volumetric frequency of 1 Hz under control condition (left) and  
750 after treatment with 33 nM of nocodazole (right). Overlay highlights trajectories, colored uniquely, and  
751 yellow circles highlight location of pauses and rescues.

752 [Movie 3](#)

753 HeLa cell in metaphase expressing GFP-EB1 imaged with lattice light-sheet microscopy, rendered with  
754 MIP, and acquired with a volumetric frequency of 1 Hz. Overlay highlights trajectories. Rendering using  
755 the Amira rendering software.

756 [Movie 4](#)

757 Dual-colored orthogonal MIP of osteocarcinoma cells expressing eGFP-labeled paxillin and embedded in  
758 collagen labelled with Alexa fluor 568 acquired with a volumetric frequency of 0.07 Hz. Overlay  
759 highlights dynamic region of interest (dynROI).

760 [Movie 5](#)

761 Mask of detected adhesions colored according to their proximity to the closest collagen fiber.

762 [Movie 6](#)

763 Mask of detected adhesions colored according to their elongations.

764 [Movie 7](#)

765 Slice of the mask of detected adhesions and collagen fibers taken at the center of cell dynROI described  
766 in Fig. 2.a and Movie 3.

767 [Movie 8](#)

768 Dual-colored orthogonal MIP of HeLa cells undergoing mitosis labeled with eGFP-labeled EB3 and  
769 mCherry-labeled CENPA acquired with a volumetric frequency of 0.1 Hz. From left to right, overlays  
770 highlight a dynROI built around centrosome trajectories, a dynROI built around CENPA trajectories, and  
771 a plane built to visualize the dynamics of chromosomes relative to the spindle location.

772 [Movie 9](#)

773 Dual-colored orthogonal MIP of HeLa cells undergoing mitosis labeled with eGFP-labeled EB3 and  
774 mCherry-labeled CENPA acquired with a volumetric frequency of 0.1 Hz. The red overlay highlights the  
775 dynROI tracking a plane built to visualize the dynamics of chromosomes relative to the spindle location.

776 [Movie 10](#)

777 Left: Dual-colored orthogonal MIP of HeLa cells during pro-metaphase acquired with a volumetric  
778 frequency of 1 Hz. Overlay highlights the motion of the dynROI. Right: Rendering of the volume  
779 described by the dynROI in its associated frame of reference. Green dots highlight plus-ends inside the  
780 mapping cone and red circle describe the motion of the target kinetochore.

781 [Movie 11](#)

782 Top: Orthogonal MIP of breast cancer cells imaged with diaSLM expressing eGFP-labelled alpha subunit  
783 of the AP-2 complex acquired with a volumetric frequency of 1 Hz. Rectangular overlays show dynROIs  
784 with different types of dynamic of activity. Dot overlays show local level of ambiguity. Bottom:  
785 Rendering of the volume described by the dynROI in their associated frames of reference.

786

787 [References](#)

- 788 1. Chen, B.-C. *et al.* Lattice light-sheet microscopy: Imaging molecules to embryos at high  
789 spatiotemporal resolution. *Science* **346**, 1257998 (2014).
- 790 2. Dean, K. M. *et al.* Diagonally Scanned Light-Sheet Microscopy for Fast Volumetric Imaging  
791 of Adherent Cells. *Biophys. J.* **110**, 1456–1465 (2016).
- 792 3. Dean, K. M., Roudot, P., Welf, E. S., Danuser, G. & Fiolka, R. Deconvolution-free  
793 Subcellular Imaging with Axially Swept Light Sheet Microscopy. *Biophys. J.* **108**, 2807–2815  
794 (2015).
- 795 4. Liu, T.-L. *et al.* Observing the cell in its native state: Imaging subcellular dynamics in  
796 multicellular organisms. *Science* **360**, eaaq1392 (2018).

- 797 5. Kervrann, C., Sorzano, C. O. S., Acton, S. T., Olivo-Marin, J. C. & Unser, M. A Guided Tour  
798 of Selected Image Processing and Analysis Methods for Fluorescence and Electron  
799 Microscopy. *IEEE J. Sel. Top. Signal Process.* **10**, 6–30 (2016).
- 800 6. Driscoll, M. K. & Danuser, G. Quantifying Modes of 3D Cell Migration. *Trends Cell Biol.* **25**,  
801 749–759 (2015).
- 802 7. Chenouard, N. *et al.* Objective comparison of particle tracking methods. *Nat. Methods* **11**,  
803 281–289 (2014).
- 804 8. Smal, I. & Meijering, E. Quantitative comparison of multiframe data association techniques  
805 for particle tracking in time-lapse fluorescence microscopy. *Med. Image Anal.* **24**, 163–189  
806 (2015).
- 807 9. Jaqaman, K. *et al.* Robust single-particle tracking in live-cell time-lapse sequences. *Nat.*  
808 *Methods* **5**, 695–702 (2008).
- 809 10. Sbalzarini, I. F. & Koumoutsakos, P. Feature point tracking and trajectory analysis for  
810 video imaging in cell biology. *J. Struct. Biol.* **151**, 182–195 (2005).
- 811 11. Godinez, W. J. & Rohr, K. Tracking virus particles in fluorescence microscopy images  
812 via a particle Kalman filter. in *Proc. Int. Symp. on Biomedical Imaging (ISBI)* 532–535  
813 (2015). doi:10.1109/ISBI.2015.7163928.
- 814 12. Wolff, C. *et al.* Multi-view light-sheet imaging and tracking with the MaMuT software  
815 reveals the cell lineage of a direct developing arthropod limb. *eLife* **7**, e34410 (2018).
- 816 13. Chenouard, N., Bloch, I. & Olivo-Marin, J. C. Multiple Hypothesis Tracking for  
817 Cluttered Biological Image Sequences. *IEEE Trans. Pattern Anal. Mach. Intell.* **35**, 2736–  
818 3750 (2013).

- 819 14. Roudot, P., Ding, L., Jaqaman, K., Kervrann, C. & Danuser, G. Piecewise-Stationary  
820 Motion Modeling and Iterative Smoothing to Track Heterogeneous Particle Motions in Dense  
821 Environments. *IEEE Trans. Image Process.* **26**, 5395–5410 (2017).
- 822 15. Jonker, R. & Volgenant, A. A shortest augmenting path algorithm for dense and sparse  
823 linear assignment problems. *Computing* **38**, 325–340 (1987).
- 824 16. Aguet, F., Antonescu, C. N., Mettlen, M., Schmid, S. L. & Danuser, G. Advances in  
825 Analysis of Low Signal-to-Noise Images Link Dynamin and AP2 to the Functions of an  
826 Endocytic Checkpoint. *Dev. Cell* **26**, 279–291 (2013).
- 827 17. Matov, A. *et al.* Analysis of microtubule dynamic instability using a plus-end growth  
828 marker. *Nat. Methods* **7**, 761–768 (2010).
- 829 18. Applegate, K. T. *et al.* plusTipTracker: Quantitative image analysis software for the  
830 measurement of microtubule dynamics. *J. Struct. Biol.* **176**, 168–184 (2011).
- 831 19. Chen, J. *et al.* Single-Molecule Dynamics of Enhanceosome Assembly in Embryonic  
832 Stem Cells. *Cell* **156**, 1274–1285 (2014).
- 833 20. Paakinaho, V. *et al.* Single-molecule analysis of steroid receptor and cofactor action in  
834 living cells. *Nat. Commun.* **8**, 1–14 (2017).
- 835 21. Voss, T. C. *et al.* Dynamic Exchange at Regulatory Elements during Chromatin  
836 Remodeling Underlies Assisted Loading Mechanism. *Cell* **146**, 544–554 (2011).
- 837 22. Gardel, M. L. *et al.* Traction stress in focal adhesions correlates biphasically with actin  
838 retrograde flow speed. *J. Cell Biol.* **183**, 999–1005 (2008).
- 839 23. Heald, R. & Khodjakov, A. Thirty years of search and capture: The complex simplicity of  
840 mitotic spindle assembly. *J. Cell Biol.* **211**, 1103–1111 (2015).

- 841 24. David, A. F. *et al.* Augmin accumulation on long-lived microtubules drives amplification  
842 and kinetochore-directed growth. *J. Cell Biol.* **218**, 2150–2168 (2019).
- 843 25. Grimm, J. B. *et al.* Bright photoactivatable fluorophores for single-molecule imaging.  
844 *Nat. Methods* **13**, 985–988 (2016).
- 845 26. Isogai, T. *et al.* Direct Arp2/3-vinculin binding is essential for cell spreading, but only on  
846 compliant substrates and in 3D. *bioRxiv* 756718 (2019) doi:10.1101/756718.
- 847 27. Yao, Y., Smal, I., Grigoriev, I., Akhmanova, A. & Meijering, E. Deep-learning method  
848 for data association in particle tracking. *Bioinformatics* **36**, 4935–4941 (2020).
- 849 28. Spilger, R. *et al.* Deep probabilistic tracking of particles in fluorescence microscopy  
850 images. *Med. Image Anal.* **72**, 102128 (2021).
- 851 29. Boquet-Pujadas, A. *et al.* BioFlow: a non-invasive, image-based method to measure  
852 speed, pressure and forces inside living cells. *Sci. Rep.* **7**, 9178 (2017).
- 853 30. Manandhar, S., Bouthemy, P., Welf, E., Roudot, P. & Kervrann, C. A sparse-to-dense  
854 method for 3D optical flow estimation in 3D light-microscopy image sequences. in *IEEE*  
855 *International Symposium on Biomedical Imaging* 952–956 (2018).  
856 doi:10.1109/ISBI.2018.8363728.
- 857 31. Manandhar, S. *et al.* 3D flow field estimation and assessment for live cell fluorescence  
858 microscopy. *Bioinformatics* (2019) doi:10.1093/bioinformatics/btz780.
- 859 32. Sofroniew, N. *et al.* *napari/napari: 0.4.11*. (Zenodo, 2021).  
860 doi:10.5281/zenodo.5399494.
- 861 33. Günther, U. *et al.* scenery: Flexible Virtual Reality Visualization on the Java VM. in  
862 *2019 IEEE Visualization Conference (VIS)* 1–5 (2019). doi:10.1109/VISUAL.2019.8933605.

- 863 34. Lindeberg, T. Feature detection with automatic scale selection. *Int. J. Comput. Vis.* **30**,  
864 79–116 (1998).
- 865 35. Besl, P. J. & McKay, N. D. A method for registration of 3-D shapes. *IEEE Trans. Pattern*  
866 *Anal. Mach. Intell.* **14**, 239–256 (1992).
- 867 36. Burkard, R. E. & Çela, E. Linear Assignment Problems and Extensions. in *Handbook of*  
868 *Combinatorial Optimization: Supplement Volume A* (eds. Du, D.-Z. & Pardalos, P. M.) 75–  
869 149 (Springer US, 1999). doi:10.1007/978-1-4757-3023-4\_2.
- 870 37. Jones, W., Chawdhary, A. & King, A. Revisiting Volgenant-Jonker for approximating  
871 graph edit distance. in *International Workshop on Graph-Based Representations in Pattern*  
872 *Recognition* 98–107 (Springer, 2015).
- 873 38. Shapiro, A. Monte Carlo simulation approach to stochastic programming. in *Proceeding*  
874 *of the 2001 Winter Simulation Conference (Cat. No.01CH37304)* vol. 1 428–431 vol.1 (2001).
- 875 39. Jaqaman, K. *et al.* Robust single-particle tracking in live-cell time-lapse sequences. *Nat.*  
876 *Methods* **5**, 695–702 (2008).
- 877 40. Frangi, A. F., Niessen, W. J., Vincken, K. L. & Viergever, M. A. Multiscale vessel  
878 enhancement filtering. in *Medical Image Computing and Computer-Assisted Intervention —*  
879 *MICCAI'98* (eds. Wells, W. M., Colchester, A. & Delp, S.) 130–137 (Springer Berlin  
880 Heidelberg, 1998).
- 881 41. Westcott, J. M. *et al.* An epigenetically distinct breast cancer cell subpopulation promotes  
882 collective invasion. *J. Clin. Invest.* **125**, 1927–1943 (2015).
- 883
